1 **Correlation scan: identifying genomic regions that affect genetic correlations applied to**  
2 **fertility traits**

3 Babatunde S. Olasege<sup>1,2</sup>, Laercio R. Porto-Neto<sup>2</sup>, Muhammad S. Tahir<sup>1,2</sup>, Gabriela C.  
4 Gouveia<sup>3</sup>, Angela Cánovas<sup>5</sup>, Ben J. Hayes<sup>4</sup> and Marina R. S. Fortes<sup>1,4</sup>

5 <sup>1</sup>The University of Queensland, School of Chemistry and Molecular Biosciences, Saint Lucia Campus, Brisbane, QLD,  
6 4072, Australia

7 <sup>2</sup>CSIRO Agriculture and Food, Saint Lucia, QLD, 4067, Australia

8 <sup>3</sup>Animal Science Department, Veterinary School, Federal University of Minas Gerais, Belo Horizonte 31270-901, Brazil

9 <sup>4</sup>The University of Queensland, Queensland Alliance for Agriculture and Food Innovation (QAAFI), Saint Lucia Campus,  
10 Brisbane, QLD, 4072, Australia

11 <sup>5</sup>University of Guelph, Department of Animal Biosciences, Centre for Genetic Improvement of Livestock, 50 Stone Rd E,  
12 Guelph N1G 2W1, ONT, Canada

13 \*Corresponding author: [m.fortes@uq.edu.au](mailto:m.fortes@uq.edu.au)

14

15 **Abstract**

16 Although the genetic correlation between complex traits have been estimated for more than a  
17 century, only recently we have started to map and understand the precise localization of the  
18 genomic region(s) that underpin these correlations. Reproductive traits are often genetically  
19 correlated, and yet we don't fully understand the complexities, synergism, or trade-offs  
20 between male and female fertility. In this study, we used reproductive traits in two cattle  
21 populations to develop a novel framework termed correlation scan. This framework was used  
22 to identify regions associated with the genetic correlations between male and female fertility  
23 traits across the bovine genome. The traits used were age at first *corpus luteum* (AGECL) and  
24 serum levels of insulin growth hormone (IGF1 measured in bulls, IGF1b, or cows, IGF1c).  
25 The methodology developed herein used correlations of 500-SNP (single nucleotide  
26 polymorphism) effects in a 100-SNPs sliding window in each chromosome to identify  
27 regions in the genome that either drive (i.e., SNP effects on the same direction) or antagonize  
28 (i.e., SNP effects in the opposite direction) the genetic correlations between traits. We used a  
29 permutation test to confirm which regions of the genome harboured significant correlations.  
30 Hence, this framework can also identify neutral genomic regions with no effect on the  
31 pairwise trait studied. About 40% of the total genomic regions were identified as driving and

32 antagonizing genetic correlations between male and female fertility traits in the two  
33 population. These regions confirmed the polygenic nature of the traits being studied and  
34 pointed to genes of interest. Quantitative trait loci (QTL) and functional enrichment analysis  
35 revealed that many significant windows co-located with known QTLs related to milk  
36 production and fertility traits, especially puberty. In general, the enriched reproductive QTLs  
37 driving the genetic correlations between male and female fertility are the same for both cattle  
38 populations, while the antagonizing regions were population specific. Moreover, most of the  
39 antagonizing regions were mapped to the chromosome X. These results suggest regions of the  
40 chromosome X for further investigation into the trade-offs between male and female fertility.  
41 Although the methodology was applied to cattle phenotypes, using high-density SNP  
42 genotypes, the general framework developed can be applied to any species or traits, and it can  
43 easily accommodate genome sequence data.

44 Keywords: Genomic correlation, drivers, antagonizing, RHOGDI, pathway analysis, QTLs

45

#### 46 **Author summary**

47 In animal breeding, it is often common to estimate genetic correlations between economically  
48 important traits. These estimated correlations represent the average of the shared genetic  
49 similarities between traits across the genome. Despite this knowledge, we are yet to uncover  
50 the regions in the genome that explain the genetic correlations estimated. Targeting  
51 reproductive traits in cattle, we developed a new framework and used it to identify multiple  
52 regions across the genome that affect genetic correlations between male and female fertility  
53 traits. While some regions have no effect on these trait correlations, other loci drive or  
54 antagonize these relationships. We further subjected the identified regions to functional  
55 analysis and annotation for biological insights. Although the methodology was applied to  
56 cattle phenotypes, using high-density SNP genotypes, the general framework can be applied

57 to any species or traits. For example, the method could be used to identify genomic regions  
58 that explain the interplay between various mental illness phenotypes in humans.

59

## 60 **Introduction**

61 In animal genetics, insight into the nature of the genetic relationships between quantitative  
62 traits are important because they improve our understanding of complex traits and diseases  
63 (1, 2). These relationships termed genetic correlations manifest when there is shared genetic  
64 influence between traits (i.e., pleiotropy) (3, 4) or when there is non-random association  
65 between loci (i.e., linkage disequilibrium) (5, 6). Estimated genetic correlations provide  
66 information on how genome-wide genetic effects align between two complex traits (7).  
67 Understanding the interplay between the genomic variants and their effects on quantitative  
68 traits can yield insights to improve the prediction of genetic merit and the understanding of  
69 complex traits' biology (8-10). Estimated genetic correlations have informed animal and crop  
70 breeding for many decades. For example, scrotal circumference is used as an indicator trait in  
71 beef cattle breeding because it is genetically correlated with female fertility traits (11).  
72 Nevertheless, we still have a limited information of the regions across genome regulating the  
73 intersexual correlations between male and female fertility traits. Investigating these regions  
74 and leveraging on the resulting biological information could inspire new approaches in  
75 livestock breeding (12, 13).

76 Over the past 100 years, different methods have been employed to estimate the genetic  
77 correlation between traits (14-17). Traditionally, these correlations are estimated from  
78 pedigree data. However, genome-wide single nucleotide polymorphisms (SNPs) are often  
79 used in recent times (18). It is possible to estimate across-sex correlation between traits and  
80 this research niche continues to attract interest among quantitative geneticists (19-21). The  
81 resulting estimates from both within and across-sex analyses range from -1 to +1, indicating

82 the strength and magnitude of the correlation between traits (22). Despite more than a century  
83 of research on estimating this parameter, it is only very recently that studies attempt to  
84 identify the region(s) in the genome that underpin genetic correlations between traits (23-25).

85 In theory, we propose that various genomic regions will contribute to the overall genetic  
86 correlation between complex traits. Further, some regions will be driving the genetic  
87 correlation while others might antagonize it. For instance, if the genetic correlation between  
88 two traits is 0.70, some regions will yield a significant and positive correlation, say 0.90,  
89 while other regions may antagonize the overall estimate, and in that region the correlation  
90 could be -0.50. Also, some genomic regions may be neutral, say 0.02 and not significant for  
91 the correlation between the studied traits. Identifying driver and antagonizing regions are of  
92 particular interest if they are for two important traits which are unfavourably correlated, for  
93 example milk yield and fertility in dairy cattle. Identification of such regions could lead to  
94 more targeted genomic selection and rapid genetic gains for both traits. Current genomic  
95 tools have created a great opportunity to advance our knowledge of genetic correlations  
96 between complex traits, by investigating the regions in the genome that drive or antagonize  
97 these correlations.

98 Here, we introduce a framework termed “correlation scan”, which uses a sliding window  
99 methodology to uncover the genomic regions driving and antagonizing genetic correlations in  
100 beef cattle. We applied the method to male and female fertility traits and showcase how the  
101 outcomes of this methodology can be interpreted in downstream analyses to gain further  
102 insight about the studied traits and their relationships. Reproductive traits are often  
103 genetically correlated, and yet we don’t fully understand the complexities, synergism, or  
104 trade-offs between male and female fertility. To demonstrate the method, we used two pairs  
105 of reproductive traits with strong genetic correlations in two independent cattle populations  
106 from our previous study (26). These traits are age at first *corpus luteum* (AGECL, i.e., female

107 puberty) and serum levels of insulin growth hormone (IGF1 measured in bulls, IGF1b, or  
108 cows, IGF1c). These pairs of traits serve as example of a positive and a negative correlation  
109 between phenotypes measured in males and females, during pubertal development. The  
110 populations used in the study are formed by either Brahman (BB) cattle or Tropical  
111 Composite (TC) cattle, as described in our previous study (26).

112

## 113 **Results**

### 114 **The total number of windows generated and analysed**

115 Using the framework developed in our study (see Materials and Methods), genomic windows  
116 with their corresponding correlation estimates ( $r$ ) for each pairwise trait in two beef cattle  
117 populations were identified. The total number of windows generated for all pairwise traits in  
118 BB was 5,558 and the number in TC was 6,876. For all windows, the chromosome  
119 coordinates and the corresponding  $r$  estimates in each of the two populations are presented in  
120 S1 Table. The  $r$  estimates for all windows were plotted against their genomic position (i.e.,  
121 midpoint between the start and end position of each window) (Figure 1). Results are  
122 presented separately per cattle population and for each pair of traits investigated.

123

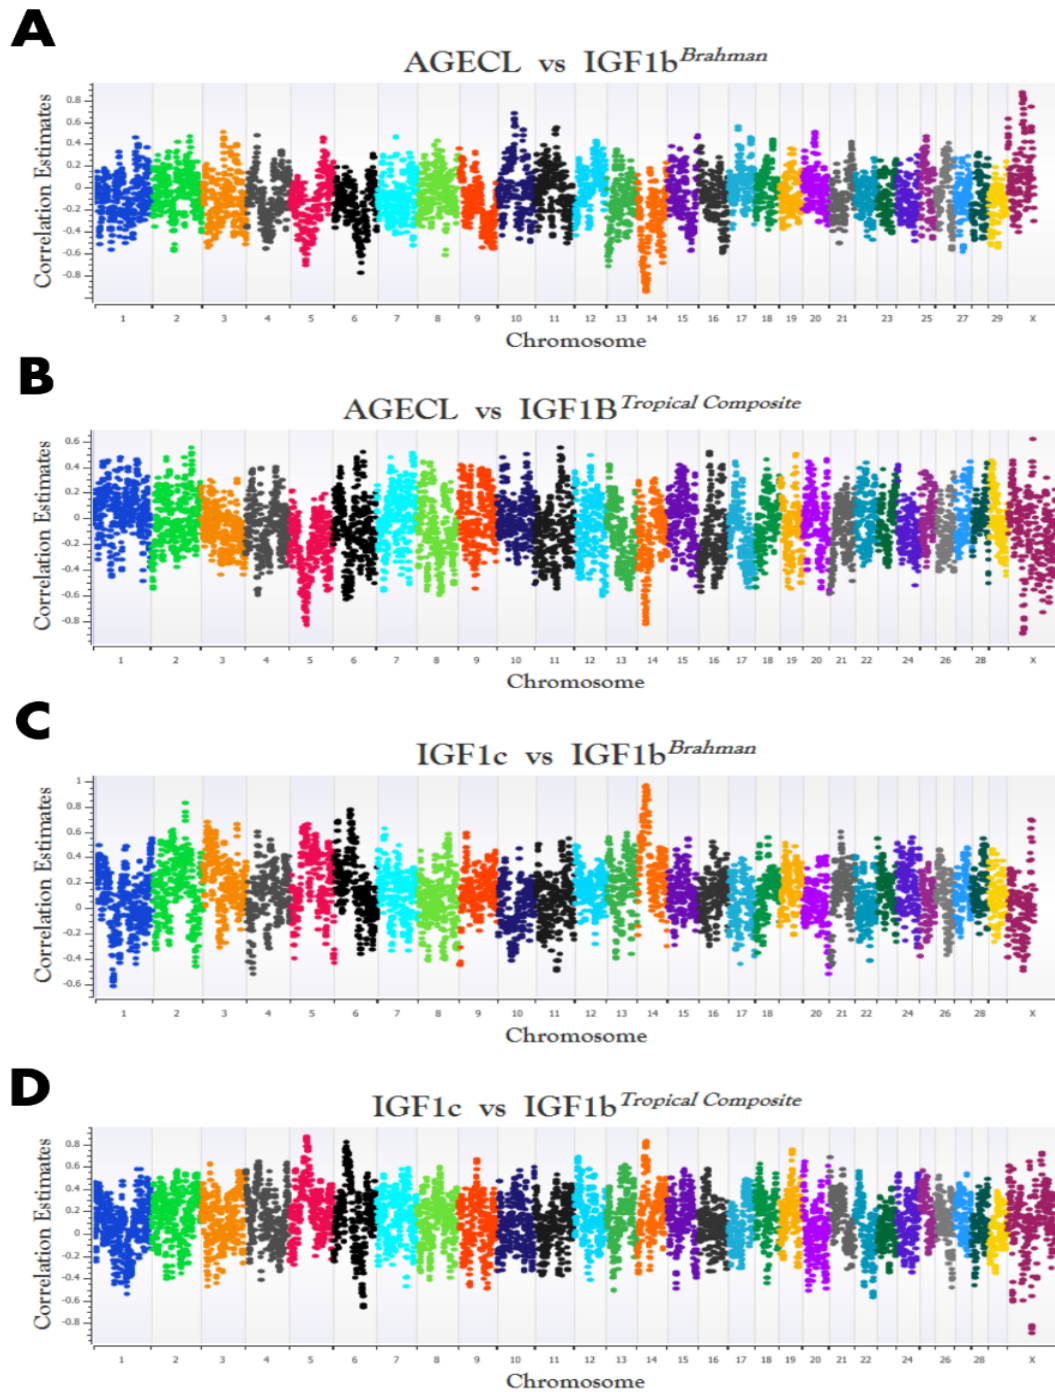

124

125 **Figure 1.** Genome plot of the regions driving and antagonizing trait correlations in Brahman  
126 (BB) and Tropical Composite (TC) for the pairwise traits (BB-AGECL vs IGF1b; **A**, TC-  
127 AGECL vs IGF1b; **B**, BB-IGF1c vs IGF1b; **C**, TC- IGF1c vs IGF1b; **D**). AGECL, age at  
128 first corpus; IGF1, serum levels of insulin growth hormone (measured in bulls, IGF1b, or  
129 cows, IGF1c). The correlation estimates were plotted on the y-axis and the genomic position  
130 (i.e., midpoint between the start and end position of each window) of each chromosome on  
131 the x-axis, according to the ARS\_UCD1.2 bovine reference genome.

132 **Driver, antagonizing and neutral genomic windows affecting genetic correlations**  
133 **between fertility traits: permutation test**

134 In order to identify drivers, antagonizing and neutral regions across the bovine genome, we  
135 performed permutation test by randomly reshuffling the Single Nucleotide Polymorphisms  
136 (SNPs) effects in each chromosome in 1,000 iterations for each trait. Then, we applied our  
137 framework on the randomized SNP effects and observed the  $r$  estimate across each iteration  
138 for each window. In most cases, the maximum and the minimum  $r$  estimates for each window  
139 at each iteration (i.e., rand 1 to rand 1,000) range between  $\pm 0.20$ . Therefore, we considered  
140 neutral windows with no significant effect on the trait correlation as windows with  $-0.20 \leq r$   
141  $\leq 0.20$  estimates. The genomic plots of the  $r$  estimates resulting from the permutation test  
142 (rand 500 only) in each population are presented in S1 Figure. S2 Table shows the numbers  
143 of windows, their chromosome coordinates, and  $r$  estimates as well as the maximum and  
144 minimum  $r$  estimates across the 1,000 iterations for each pair of traits in each of the two  
145 populations.

146 As a result of the permutation test, we considered significant windows with  $r$  estimates  $> 0.2$   
147 and  $r$  estimates  $< -0.2$ . These thresholds were used to define the significant windows or  
148 regions (i.e., driver and antagonizing) from non-significant (i.e., neutral) windows or regions.  
149 Depending on the overall genetic correlation between traits, driver and antagonizing windows  
150 can be deduced: in driver windows, the  $r$  estimate has the same direction, positive or  
151 negative, as the overall genetic correlation; in antagonizing windows it is the opposite.

152 The number of significant driver windows for the correlation between AGECL and IGF1b  
153 was 1,636 in BB and 1,914 in TC cattle. The number of significant windows for the  
154 antagonizing was 547 in BB and 898 in TC cattle, for AGECL vs IGF1b. For the correlation  
155 between IGF1c and IGF1b, the number of significant driver windows was 1,931 in BB and

156 2,549 in TC cattle. The antagonizing windows was 402 in BB and 587 in TC cattle (IGF1c vs  
 157 IGF1b). The numbers of neutral windows were as follows: 3,375 in BB, and 4,064 in TC for  
 158 AGECL vs IGF1b; and 3,225 in BB, and 3,740 in TC for IGF1c vs IGF1b. See Table 1 for  
 159 details on numbers of windows in the two beef cattle populations. In addition, the lists of  
 160 windows with their chromosomal coordinates for all driver, antagonizing, and neutral regions  
 161 are presented in S3 Table.

162 **Table 1: The number of windows generated for the driver, antagonizing and neutral**  
 163 **windows for each pairwise trait in Brahman and Tropical Composite population.**

| Pairwise Trait     | Number of windows (percentage to the total number of window) |                  |                | Total number of windows |
|--------------------|--------------------------------------------------------------|------------------|----------------|-------------------------|
|                    | Driver (%)                                                   | Antagonizing (%) | Neutral (%)    |                         |
| Brahman            |                                                              |                  |                |                         |
| AGECL vs IGF1b     | 1,636 (29.40%)                                               | 547 (9.84%)      | 3,375 (60.72%) | 5,558                   |
| IGF1c vs IGF1b     | 1,931 (34.74%)                                               | 402 (7.23%)      | 3,225 (58.03%) | 5,558                   |
| Tropical Composite |                                                              |                  |                |                         |
| AGECL vs IGF1b     | 1914 (27.84%)                                                | 898 (13.06%)     | 4064 (59.10%)  | 6,876                   |
| IGF1c vs IGF1b     | 2549 (37.73%)                                                | 587 (8.54%)      | 3740 (54.39%)  | 6,876                   |

164 **AGECL**, age at first *corpus*; **IGF1c**, serum levels of insulin growth hormone measured in  
 165 cow; **IGF1b**, serum levels of insulin growth hormone measured in bulls

166

167 For the correlation between AGECL and IGF1b (overall genome-wide correlation of -0.65  
 168 (BB) and -0.55 (TC), see Table 2), the largest **r** estimate for the driver windows was -0.96  
 169 (bovine chromosome (BTA)14: 23.04 - 25.29Mb) in BB and -0.91 (BTAX: 39.76 - 42.86Mb)  
 170 in TC. For the antagonizing windows, the largest **r** estimate was 0.87 (BTAX: 40.87 -  
 171 43.88Mb) in BB and 0.61 (BTAX: 66.62 - 69.622Mb) in TC.



172 For the correlation between IGF1c and IGF1b (overall genome-wide correlation of 0.86 (BB)  
173 and 0.93 (TC), see Table 2), the largest estimate for the driver windows was 0.97 (BTA14:  
174 22.68 - 24.96Mb) in BB and 0.87 (BTA5: 46.13- 47.89Mb) in TC, while the estimate for the  
175 antagonizing was -0.62 (BTA1: 49.01 - 51.67Mb) in BB and -0.90 (BTAX: 65.64 - 68.39Mb)  
176 in TC. All  $r$  estimates are plotted in Figure 1.

177

### 178 **Genes and Quantitative Trait Loci (QTL) within driver and antagonizing regions across** 179 **the two populations**

180 Defining driver and antagonizing regions separately for each pair of traits, allowed us to  
181 identify the genes and QTLs within these regions for each of the two beef cattle populations.  
182 The percentage of the overlapping genes (Figure 2a) and QTLs (Figure 2b) across both  
183 populations was studied. The percentages of genes shared across the significant regions in BB  
184 and TC were calculated as a function of the total number of genes in BB or TC, respectively,  
185 and so they differ (Figure 2a and 2b).

186 The percentage of overlapping genes for each pair of traits in the two populations were as  
187 follows: for AGECL vs IGF1b driver regions, about 48% of the total number of genes  
188 annotated were shared between the two population, whereas, for the antagonizing regions,  
189 22% of the gene annotated in BB were present in the TC population, and 26% of the genes  
190 annotated in TC were present in BB; for IGF1c vs IGF1b, the two populations shared about  
191 58% of total number of genes annotated for the driver regions and about 17% were shared for  
192 the antagonizing regions.

193 The percentage of overlapping QTLs for each pair of traits in BB and TC population were as  
194 follows: for AGECL vs IGF1b driver regions, 52% of the QTLs annotated in BB were  
195 present in TC and 35% of the QTLs annotated in TC were present in BB, whereas, for the

196 antagonizing regions, 20% of the QTLs annotated in BB were present in TC and 18% of the  
197 QTLs annotated in TC were present in BB; for IGF1c vs IGF1b, 56% of the genes annotated  
198 in BB were present in TC, and 52% of the genes annotated in TC were present in BB,  
199 whereas, for the antagonizing regions, 29% of the genes annotated in BB were present in TC  
200 and 33% of the genes annotated in TC were present in BB population.

201

## Drivers

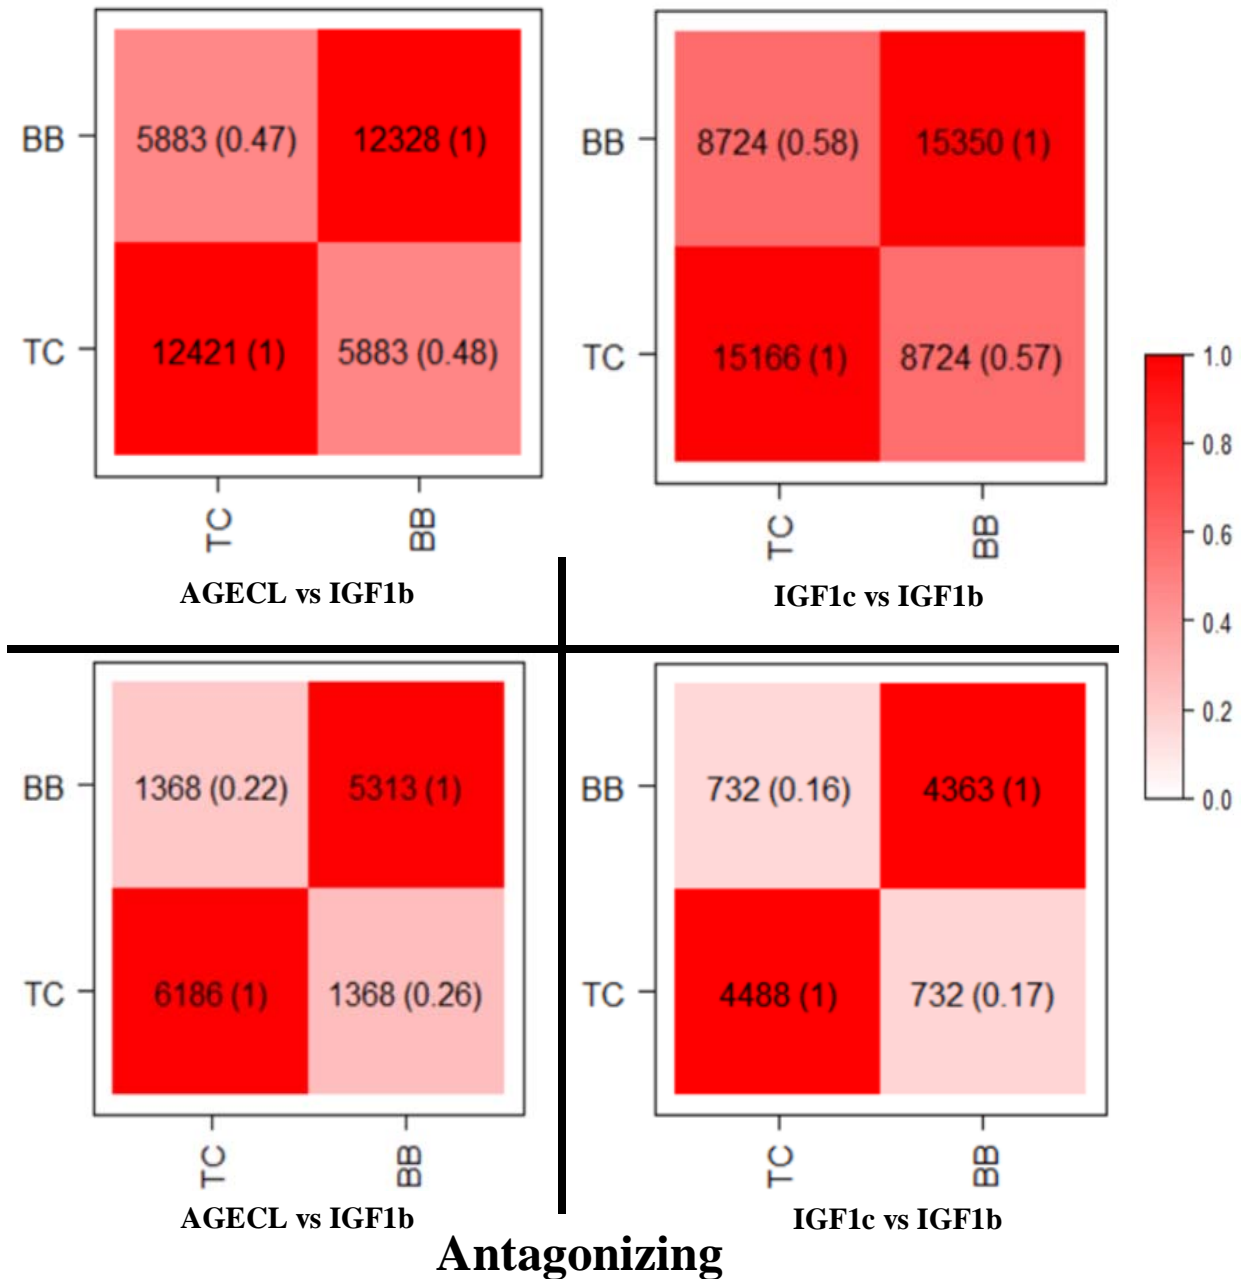

202

203 **Figure 2a.** Genes annotated in the significant (i.e., driver and antagonizing) genomic regions  
 204 identified as explaining the genetic correlations between male and female fertility traits in  
 205 Brahman (BB) and Tropical Composite (TC) population. The overlaps between the two  
 206 studied populations are in the diagonal of each plot for each pair of traits within the driver  
 207 (above) and antagonizing (below) regions. The darker the colour within the squares, the  
 208 higher the percentage of shared genes or QTLs. **AGECL**, age at first corpus; **IGF1**, serum  
 209 levels of insulin growth hormone (measured in bulls, **IGF1b**, or cows, **IGF1c**).

210

## Drivers

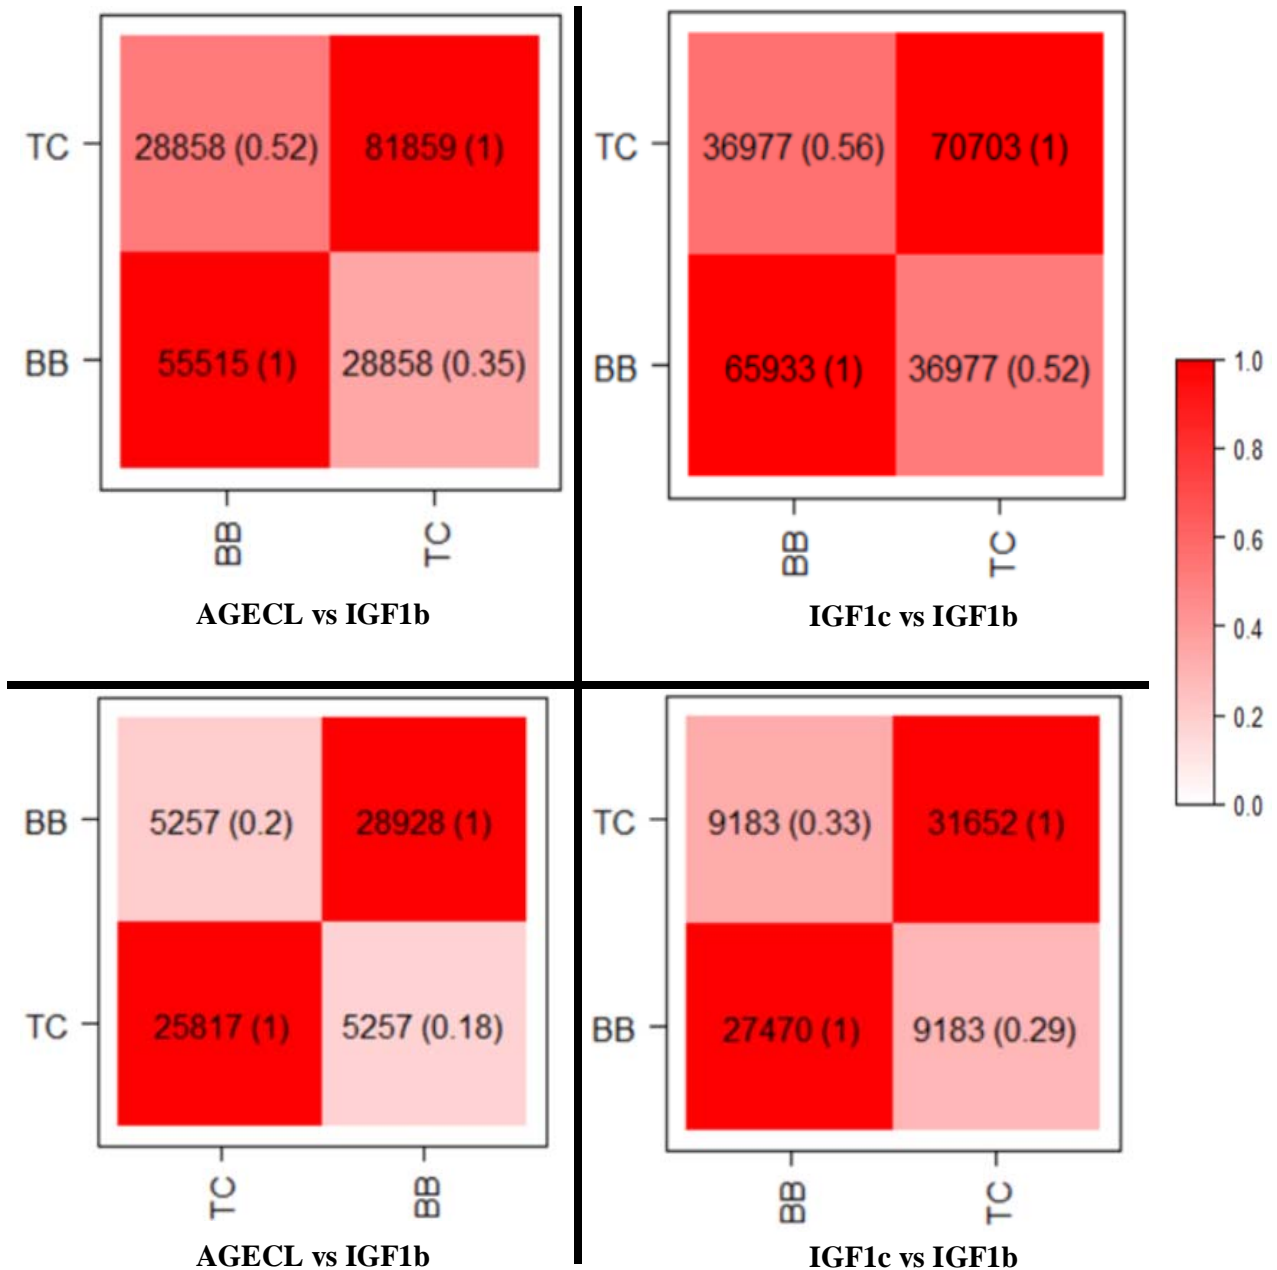

## Antagonizing

211 **Figure 2a.** QTLs annotated in the significant (i.e., driver and antagonizing) genomic regions  
 212 identified as explaining the genetic correlations between male and female fertility traits in  
 213 Brahman (BB) and Tropical Composite (TC) population. The overlaps between the two  
 214 studied populations are in the diagonal of each plot for each pair of traits within the driver  
 215 (above) and antagonizing (below) regions. The darker the colour within the squares, the  
 216 higher the percentage of shared genes or QTLs. AGECL, age at first corpus luteum; IGF1,  
 217 serum levels of insulin growth hormone (measured in bulls, IGF1b, or cows, IGF1c).  
 218

219 **Functional classification of QTLs within genomic regions that explain the genetic**  
220 **correlations between male and female fertility**

221 To infer biological function and mine the existing literature, we examined the types of QTL  
222 (milk, reproduction, production, meat and carcass, health and exterior) present in the  
223 significant genomic regions identified above using GALLO (27). The most frequent QTLs  
224 across all pairwise traits in the two populations for the driver and antagonizing regions were  
225 QTLs related to milk production, accounting for about 30-51% in most cases. This was  
226 followed by reproductive QTLs accounting for about 13-48% and production QTLs  
227 comprising 6-24%. Other QTL types (Exterior, health and meat and carcass) accounted for a  
228 relatively small proportion of QTLs in the significant regions (Figure 3a and 3b). In addition,  
229 we report the top 10 results for QTLs related to reproductive traits as these are relevant to our  
230 studied traits (Figure 3a and 3b). Among these reproductive QTLs, traits related to puberty  
231 (i.e., age at puberty, scrotal circumference) were prevalent in both populations.

232

**A**

**AGECL-IGF1b-Driver**

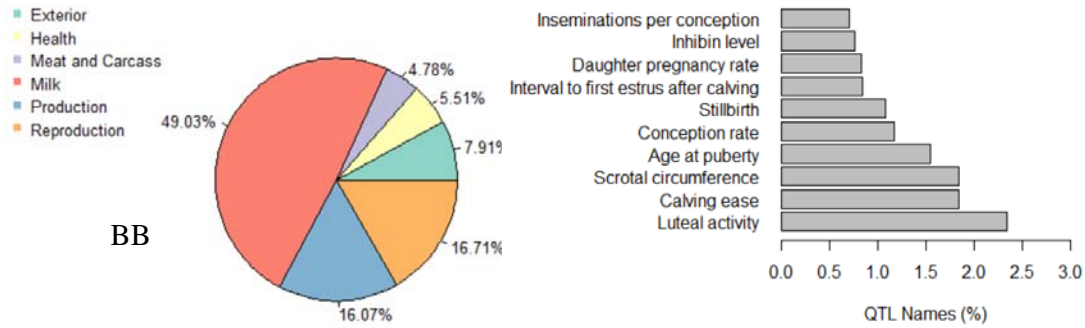

233

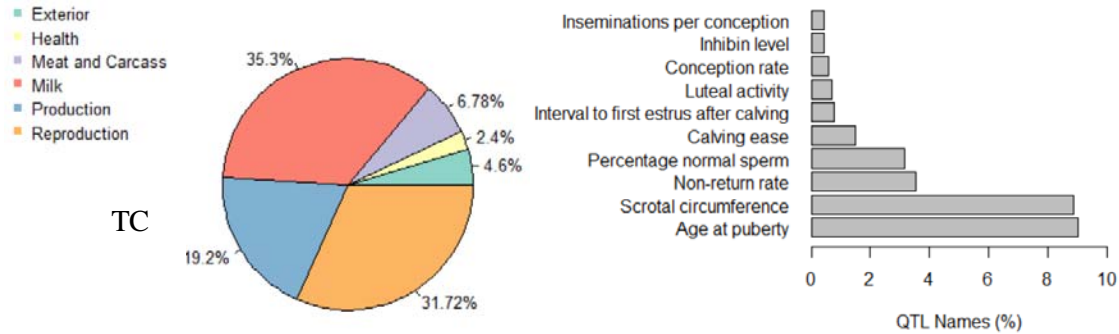

234

235

**B**

**AGECL-IGF1b-Antagonizing**

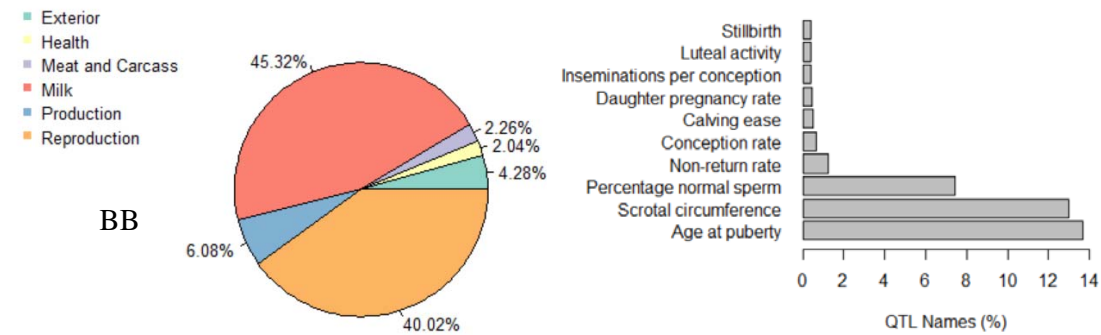

236

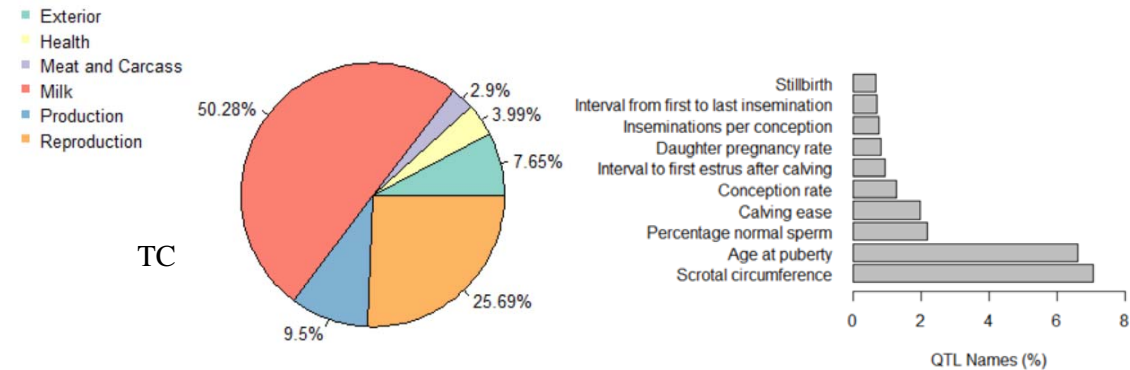

237

238 **Figure 3a.** Percentage of QTL type (pie chart) and trait related to reproduction QTLs  
 239 (barplots) for the QTL annotation results obtained for (A) AGECL vs IGF1b - driver, (B)  
 240 AGECL vs IGF1b- antagonizing in Brahman (BB) and Tropical Composite (TC) population.  
 241 **AGECL**, age at first corpus luteum, **IGF1c**, **IGF1**, serum levels of insulin growth hormone  
 242 (measured in bulls, **IGF1b**, or cows, **IGF1c**)

243

**IGF1c vs IGF1b-Driver**

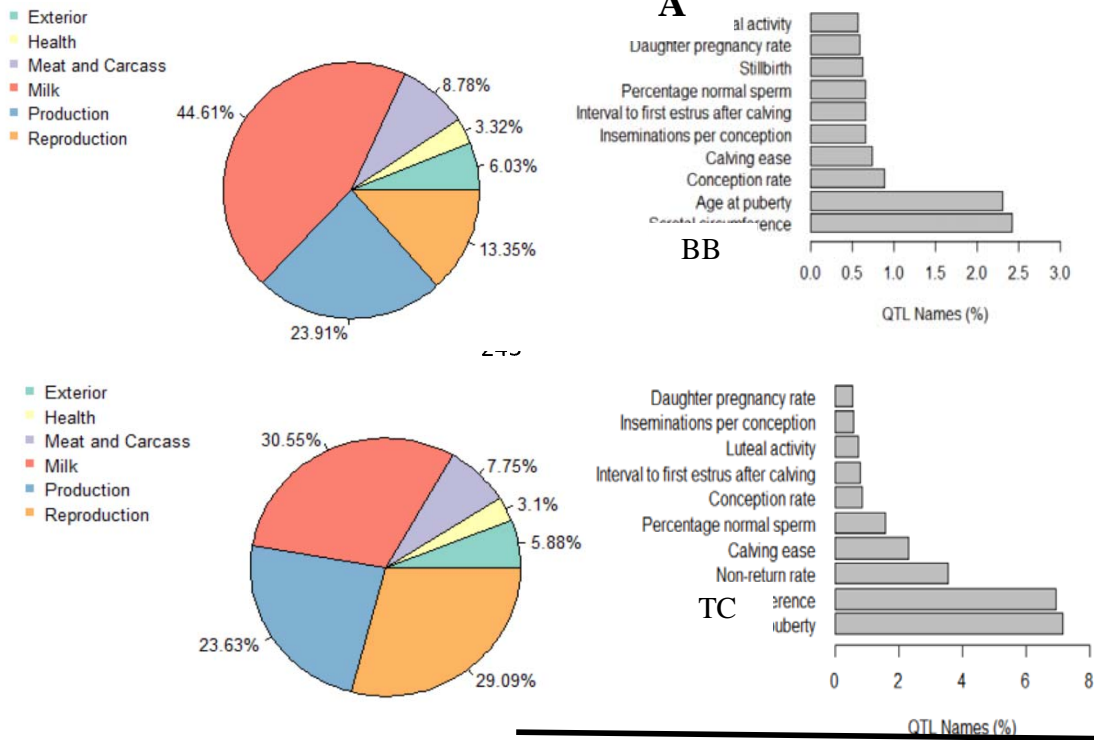

246

247

**IGF1c vs IGF1b-Ant**

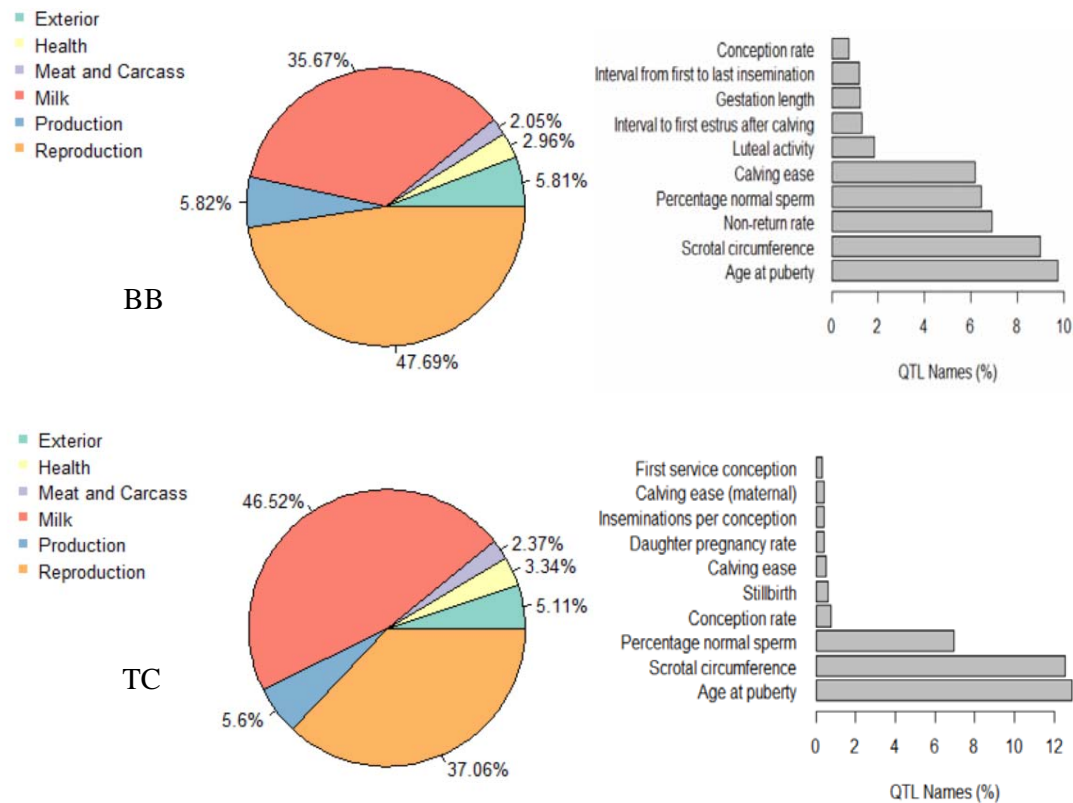

248

249

250

251

252

253

254

**Figure 3b.** Percentage of QTL type (pie chart) and trait related to reproduction QTLs (barplots) for the QTL annotation obtained for (A) IGF1c vs IGF1b- driver, (B) IGF1c vs IGF1b- antagonizing in Brahman (BB) and Tropical Composite (TC) population. **AGECL**, age at first corpus luteum, **IGF1**, serum levels of insulin growth hormone (measured in bulls, or cows, **IGF1b**, or **IGF1c**)

## 255 **QTL enrichment analysis**

256 We performed a chromosome-wide QTL enrichment analysis to further test the significance  
257 of the QTLs identified for all the driver and antagonizing regions in each cattle population,  
258 for each trait pair using GALLO (27). Enriched QTLs for the studied traits span across most  
259 QTL types, indicating the presence of complex genetic mechanisms. The results of the  
260 chromosome-wide QTLs enrichment (FDR-corrected  $p\text{-value} \leq 0.05$ ) for the driver and  
261 antagonizing regions for all pairwise traits in each population are presented in S4 Table.

262 For the driver regions, the number of QTLs enriched over a wide range of chromosomes for  
263 AGECL vs IGF1b were 233 and 144 in BB and TC beef cattle population, respectively. The  
264 number was 227 (BB) and 220 (TC) for IGF1c vs IGF1b. For AGECL vs IGF1b, the most  
265 enriched chromosome (no of enriched QTLs in parenthesis) was BTA5 (36) and BTA14 (18)  
266 in BB and TC, respectively. IGF1c vs IGF1b also followed similar pattern with the result  
267 above, with BTA5(41) being the most enriched chromosome in BB and BTA14 (51) as the  
268 most in TC.

269 For the antagonizing regions, the number of QTLs enriched across the bovine chromosomes  
270 for AGECL vs IGF1b were 127 and 178 in BB and TC beef cattle population, respectively.  
271 The number was 179 (BB) and 195 (TC) for IGF1c vs IGF1b. For AGECL vs IGF1b, the  
272 most enriched chromosome was BTA17 (14) and BTA26 (21) in BB and TC, respectively.  
273 For IGF1c vs IGF1b, however, BTA14 (23) was the most enriched chromosome for these  
274 regions in BB, whereas, in TC, BTA14 (23) was the most enriched.

275 To identify the common results and shared biology between the driver and the antagonizing  
276 regions, we also investigated the overlaps of the QTL types associated with the studied trait  
277 (i.e., reproduction) in the two populations. The relationship between the top 10 enriched  
278 reproductive QTLs in BB and TC are presented in Figure 4a and 4b. Irrespective of the trait



279 pair, for the driver regions, the reproductive QTLs in BB in most cases overlap with those  
 280 identified in TC. However, for the antagonizing regions, not all reproductive QTLs in BB  
 281 were found in TC beef cattle population.

## Driver

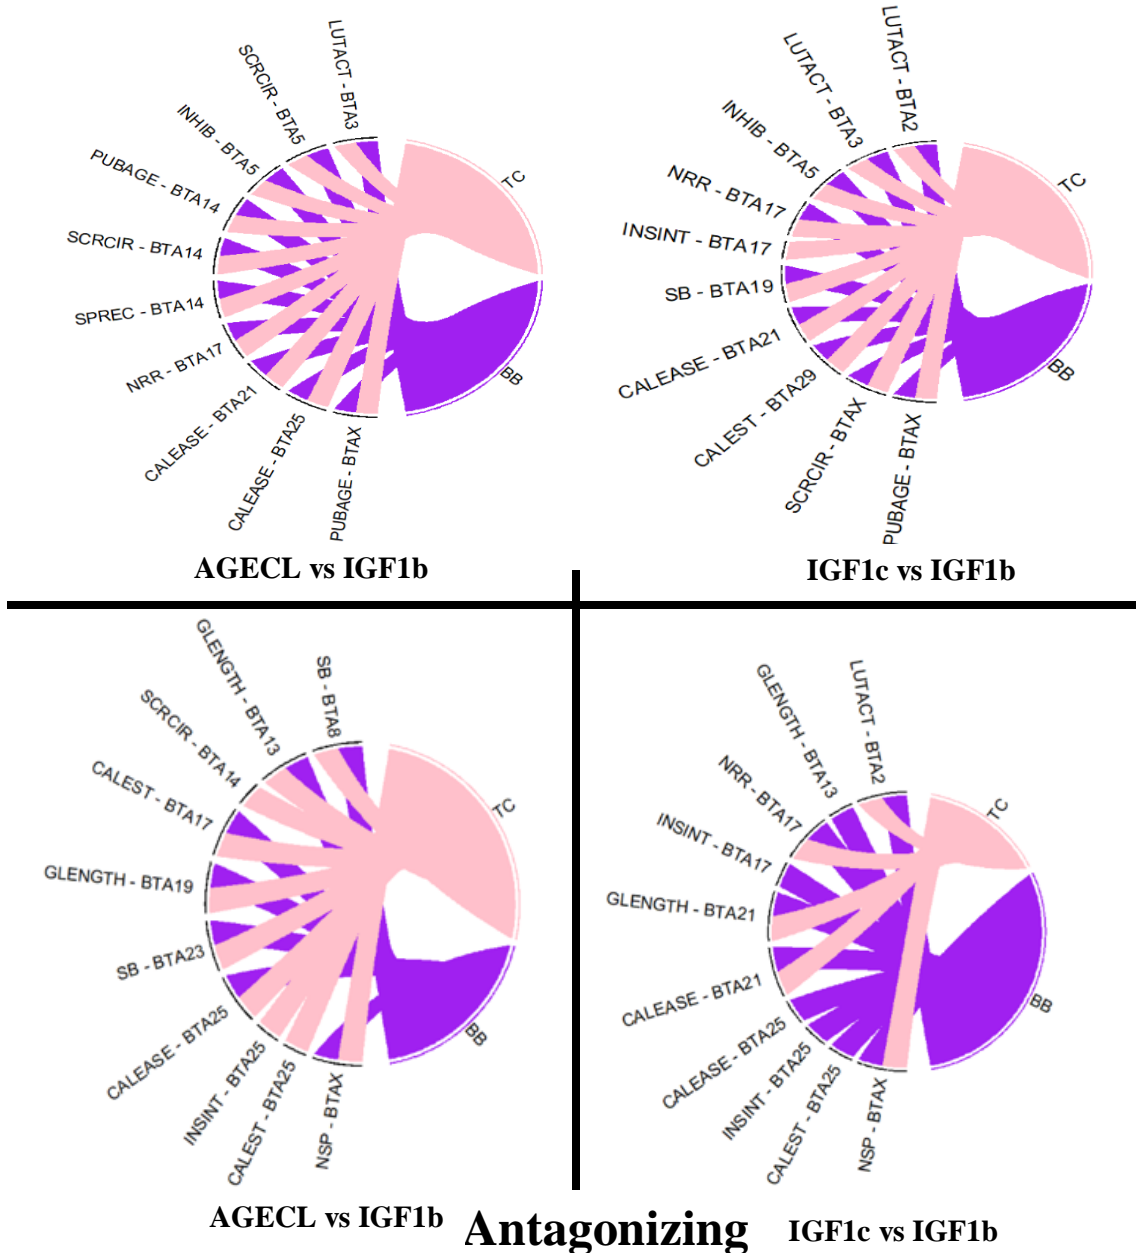

282

283

284 **Figure 4.** Chord plot showing the relationship between the top 10 enriched reproductive QTLs  
 285 between Brahman (BB) and Tropical Composite (TC) for the driver (top) and the antagonizing  
 286 (bottom) regions of the studied traits. **AGECL**, age at first corpus luteum, **IGF1c**, serum levels  
 287 of insulin growth hormone measured in cow; **IGF1b**, LUTACT, Luteal activity; **SCRCIR**,  
 288 Scrotal circumference; **INHIB**, Inhibin level; **PUBAGE**, Age at puberty; **SPREC**, Sexual

289 precocity; NRR, Non-return rate; CALEASE, Calving ease; INSINT, Interval from first to  
290 last insemination; SB, Still birth; CALEST, Interval to first estrus after calving; GLENGTH,  
291 Gestation length, NSP, Percentage normal sperm.  
292

### 293 **Functional enrichment analysis**

294 Leveraging our methodology's directionality of gene effects with Ingenuity Pathway  
295 Analysis (IPA; <http://www.ingenuity.com>), we identified the enriched canonical metabolic  
296 pathways enriched at Benjamini–Hochberg corrected p-values (BH-*P*-value) of  $p < 0.01$ . The  
297 graphical presentation of the canonical metabolic pathways predicted by IPA to be enriched  
298 and the proportion of driver and antagonizing genes in each pathway for all pairwise traits  
299 investigated in each population are illustrated in S2A-H Figure. Although IPA provided  
300 information about whether the predicted pathways were being activated or inhibited based on  
301 our data, we remain cautious when interpreting our results since the *r* estimates are not the  
302 same as gene expression values, and IPA was originally designed to mine gene expression  
303 data.

304 The number of pathways enriched for AGECL vs IGF1b was 49 in BB and 68 in TC. For  
305 IGF1c vs IGF1b, the number of enriched pathways was 156 and 87 in BB and TC,  
306 respectively. For AGECL vs IGF1b in BB, the top 5 enriched canonical metabolic pathways  
307 were cardiac hypertrophy signaling (Enhanced), toll-like Receptor signaling, IL-6 Signaling,  
308 hepatic fibrosis signaling pathway and STAT3 Pathway. In TC population, the top 5 enriched  
309 canonical metabolic pathways were breast cancer regulation by stathmin1, signaling by Rho  
310 family GTPases, opioid signaling pathway, endocannabinoid developing neuron pathway,  
311 and CREB signaling in neurons.

312 For IGF1c vs IGF1b in BB, the top 5 enriched canonical metabolic pathways were cardiac  
313 hypertrophy signaling, CREB signaling in neurons, thrombin signaling, estrogen receptor  
314 signaling, opioid signaling pathway and AMPK signaling. In TC, the top 5 enriched pathways

315 were CREB signaling in neurons, cardiac hypertrophy signaling (enhanced), opioid signaling  
316 pathway, *gαs* signaling and breast cancer regulation by *stathmin1*. The enriched canonical  
317 metabolic pathways and all the genes involved in each pathway are available in S5 Table.

318

## 319 **Discussion**

320 Complex phenotypes, including fertility, consist of multiple genetically correlated rather than  
321 independent traits (6). The interplay between traits involve many genomic regions, usually in  
322 a large and polygenic regulatory network (28-31). Genomic signals that regulate (i.e., drive or  
323 antagonize) complex traits are widely spread across the genome, including near many genes  
324 without significant effect on the phenotype or disease (29). In the present post-genomic era,  
325 unravelling the genomic regions that regulate complex traits and the metabolic pathways  
326 associated with these phenotypes has become an important aspect of genetic studies in  
327 humans and animals (32). In this study, we developed a novel framework termed correlation  
328 scan to reveal the significant regions that either drives or antagonize the genetic correlations  
329 between traits, across the genome. In addition, this method can also reveal genomic regions  
330 with no effect on the studied traits (neutral windows). The framework developed uses best  
331 linear unbiased prediction (BLUP) solution of SNP effects to estimate the local correlations  
332 between studied traits. Local correlations are based on sliding windows of 500-SNPs. We  
333 applied these sliding windows approach to reproductive traits measured in two populations  
334 and subject the outcomes, significant windows, to further analyses using GALLO (27) and  
335 IPA (<http://www.ingenuity.com>) to gain further insight about the biology of studied traits and  
336 their relationships. Although the methodology was applied to beef cattle traits, using high-  
337 density SNP chip genotypes, the general framework can be applied to any species, any traits,  
338 and it can easily accommodate sequence level data.

339 Our results agreed with the established notion that multiple loci regulate reproductive traits  
340 (33-35). Also, the mode of action of these loci and the magnitude of their effect varies across  
341 the genome. While some regions had no effect on the genetic correlations under  
342 investigation, other loci drive or antagonize the relationships between male and female  
343 fertility. The identification of driver and antagonizing loci creates opportunities to further  
344 understand the molecular mechanisms affecting quantitative traits. For example, correlations  
345 estimated from SNP effects have allowed researchers to construct gene networks (36).  
346 Thereby, these types of approaches contribute to linking genotype with phenotype.

347 The two beef cattle populations investigated in this study are distinct in terms of their genetic  
348 composition. Brahman (BB) cattle are typically of *Bos indicus* origin whereas TC beef cattle  
349 emanated from the crossing between *Bos indicus* and *Bos taurus* breed (37). Despite these  
350 differences, we found that a considerable number of annotated genes and QTLs driving trait  
351 correlation overlaps across breeds, although with variations in the size of SNP effects. This  
352 corroborates the findings of Bolormaa *et al.* (38), where a substantial number of QTLs were  
353 found segregating in *Bos indicus* and composite cattle using the same dataset. In this present  
354 study, the top genomic signal driving trait correlation across all pairwise traits in BB were  
355 located on BTA14. The significant region contains a widely known and well-characterized  
356 QTL, including the *PLAG1* gene, reported to be associated with growth and reproductive  
357 traits in our populations and other studies (39-44). In TC however, the top signal differs  
358 across traits and mostly spread across two or three chromosomes, although with considerable  
359 number of overlaps with BB. This could be partly due to the variations in the architecture of  
360 composite breed (45). The genome of composite breeds usually contains new haplotypes  
361 emerging from generations of crossbreeding. Moreover, the contribution of the founder  
362 populations on chromosomes and specific genomic regions are usually unevenly distributed,  
363 which most likely shapes the genome of composite breeds (45). In short, differences between

364 BB and TC are likely to impact the results of our analyses. Breed differences are expected,  
365 and so when two breeds share a similar result, it enhances our confidence in calling  
366 significant windows for the interplay between male and female fertility traits.

367 Most genomic regions antagonizing the genetic correlations between male and female  
368 fertility traits were located on chromosome X. Gene expression on chromosome X differs  
369 across-sex, resulting in genomic sexual conflict (46-48). Genes in these antagonizing regions  
370 include *POIFB*, *ZNF711*, *APOOL*, *HDX*, *DACH2*, *FAM133A*, among others. These genes are  
371 associated with different disorders including infertility, reproductive deficiencies, primary  
372 ovarian failure (49-51). When some of these genes are over-expressed, it can dysregulate the  
373 cristae morphology of the mammalian mitochondria (52). Understanding how these  
374 antagonizing genes interact to influence (in)fertility could help improve the reproductive  
375 potentials of beef cattle.

376 In animal production, more research is carried out on milk production-related traits, thereby  
377 creating large proportion of records for these traits in the cattle QTL database. These volumes  
378 of records can create a bias in the QTLs representativeness (27). The QTL enrichment  
379 analysis allows testing the significance of the QTL representative using chromosome-wide  
380 approach to detect specific genomic region with many QTLs for a specific trait. For example,  
381 taking the driver regions for AGECL vs IGF1b in BB, the top enriched QTLs was found in  
382 BTA5, harbouring 36 QTLs. These QTLs comprised 8 different QTLs for reproduction  
383 (inhibin level, scrotal circumference, interval of first estrus after calving, gestation length,  
384 insemination per conception, conception rate, daughter pregnancy rate, and pregnancy rate).  
385 These 8-traits listed here have been found to be correlated with puberty (studied traits) in  
386 cattle. For instance, inhibin is regarded as a biomarker for sexual development because it  
387 regulates spermatogenesis in both beef and dairy bulls (53, 54). Moderate genetic correlation  
388 was found between inhibin and AGECL (55) and between inhibin and IGF1b (56) in BB.

389 Scrotal circumference has also been found to be a moderate predictor of AGECL and IGF1b  
390 in BB (21, 26). Thus, BTA5 may be a candidate region for fertility in BB beef cattle  
391 population. Other enriched QTLs out of the 36 mentioned above include 8 different  
392 production traits (average daily gain, metabolic body weight, length of productive life, body  
393 weight, rump width, body depth, residual feed intake, and net merit). These traits are related  
394 to feed efficiency in cattle. Improving feed efficiency of beef cattle is a major concern for  
395 beef producers. A recent study from Canal *et al.* (57) found that heifers that efficiently utilize  
396 feed attain puberty early than less feed efficient ones. Moreover, heifers that attain puberty at  
397 a relatively younger age have the potential to conceive early in life and be more productive  
398 throughout their lifetime (58). In addition, IGF1 is an effective selection tools to improve  
399 feed efficiency and other production related traits, allowing breeders to preselect animals that  
400 can utilize feed efficiently (59, 60). Other enriched QTLs for BTA5 in BB are related to  
401 exterior (7), milk (6), milk and carcass (5) and health (3) traits. Of note, the objective of most  
402 beef cattle breeding programs is to change the genetic merit of their cattle for many traits of  
403 interest (61). The recurrent association of the BTA5 with multiple traits could suggest  
404 complex genetic mechanisms such as pleiotropy, epistasis, hitchhiking effects, linkage  
405 disequilibrium etc., regulating this chromosomal region (62, 63). Therefore, breeders could  
406 target BTA5 to select multiple traits without any antagonistic effect on other traits listed  
407 herein.

408 Another interesting result from this study is the shared biology between the two breeds  
409 relative to the traits under study. Despite breed differences, the enriched reproductive QTLs  
410 driving the genetic correlations between male and female fertility are the same for the two  
411 cattle populations (Figure 4). Most of the enriched QTLs are related to reproductive traits  
412 measured early life. A possible explanation could be that the reproductive phenotypes shared  
413 common fundamental biology in the two populations. For the antagonizing regions, however,

414 most of the reproductive QTLs were breed specific depending on the trait pairwise. Perhaps,  
415 this could be partly explained by the diverse genetic composition of the two breeds.  
416 Understanding the genomic architectures driving these early-in-life male and female fertility  
417 traits and their known genomic antagonisms could foster effective selection for both traits in  
418 tropical breeds (64, 65).

419 The major challenge faced by researchers when analysing an overwhelmingly large amount  
420 of genomic data is how to extract meaningful mechanistic insights into the underlying  
421 biology characterizing the given trait under study. To increase the explanatory power of  
422 genomic studies, pathway analysis has become first choice, providing researcher with the  
423 ability to infer meanings to high-throughput genomic data (66). Leveraging the directionality  
424 of gene effects from our method with IPA knowledge base, several biological pathways  
425 known to be involved in reproduction (i.e., studied trait) were significantly enriched for all  
426 pairwise traits investigated across the two breeds. These pathways include estrogen receptor  
427 signaling, p38 MAPK signaling, GnRH signaling, sperm motility, cAMP-mediated signaling,  
428 AMPK signaling, and androgen signaling. Although IPA provided information about the  
429 activation or inhibition state for the enriched canonical metabolic pathways with the use of  
430 the  $r$  estimates in place of the gene expression values, we are not sure if these pathways were  
431 being activated or inhibited since we don't have information about the expression values of  
432 the genes in these pathways. For example, Rho GDP Dissociation Inhibitor (RHOGDI)  
433 pathway was the only significant signaling pathway found to be inhibited across breeds in all  
434 pairwise traits investigated using IPA comparison analysis. The RHOGDIs (RHOGDI $\alpha$ ,  
435 RHOGDI $\beta$  and RHOGDI $\gamma$ ) are well-characterized as a negative regulator of Rho GTPases  
436 (67). These Rho GTPases play pivotal roles within the cell, including cell migration,  
437 membrane trafficking, invasion, gene transcription, polarity, adhesion, cell survival and  
438 death; a process significantly involved in cancer initiation and metastasis (68, 69). Once

439 RHOGDI is inhibited, it induces constitutive activation of Rho GTPases, resulting in several  
440 malignant phenotype including tumour growth, angiogenesis, and invasive phenotypes (69,  
441 70). For instance, knocking out one of the three RHODGI genes resulted in a renal defect that  
442 progressively leads to death in adult mice, although embryonic development was not affected  
443 (71). Togawa *et al.* (72) also found that male mice lacking RHOGDI1 were infertile with  
444 impaired spermatogenesis. The authors also reported problems of implantation in female  
445 mice due to this knockout. The knockout of two of the three RHOGDIs often results in a  
446 more severe phenotypes with additional immunological defects than when one of the  
447 RHOGDIs is disrupted (73). Numerous studies have also reported that the RHOGDIs protein  
448 are involved in sperm movement, sperm capacitation and acrosome reaction, a process that is  
449 critical to occur for the sperm to interact and penetrate the egg for fertilization to take place  
450 (74-76). Perhaps, this could be the major reason why signaling by Rho family GTPases were  
451 enriched in our metabolic pathway analysis. Notably, low reproduction performance is one of  
452 the major challenges facing beef producers in Northern Australia (77, 78). Reproductive  
453 wastage is usually common, which is often a result of pregnancy failure and calf mortality  
454 (79, 80). Given the role of the RHODGI pathway in reproduction, future studies could use  
455 gene expression data to investigate the genes involved in these pathways as a candidate  
456 region for infertility in cattle since we only use the  $r$  estimates in this study.

## 457 **Materials and Methods**

### 458 *Traits, genotypes and estimated genetic correlations*

459 The traits used to demonstrate this methodology are a subset of traits from our previous study  
460 (26), where bivariate genetic correlations were estimated between 7 male and 6 female early-  
461 in-life reproductive phenotypes in two independent tropical beef cattle populations (BB and  
462 TC). The two female traits selected for this study are age at detection of the first *corpus*



463 *luteum* (AGECL, days) and cows' blood concentration of insulin growth-factor 1, measured  
 464 at 18 months of age (IGF1c). Only one male trait was selected: the blood concentration of  
 465 insulin growth-factor 1, measured at 6 months of age (IGF1b). These traits are important in  
 466 beef cattle fertility, especially during pubertal development. The estimated genomic  
 467 correlations between the traits listed above in each population have been reported in our  
 468 previous study (26). These estimates and their corresponding standard error (S.E), number of  
 469 SNPs and number of animals in each population are provided in Table 2. These traits were  
 470 selected because they had significant estimates of genomic correlation (i.e., traits with  
 471 standard error (S.E) less than half of the size of the correlation) and different strength or  
 472 direction of genetic relationships (i.e., negatively, and positively correlated traits). In brief,  
 473 across-sex genetic correlations were estimated in a bivariate analysis using the linear mixed  
 474 model approach. Firstly, the 770,000 genotypes were mapped to the new assembly of the  
 475 bovine reference genome (ARS\_UCD1.2, GenBank assembly accession GCA\_002263795.2;  
 476 (81)). After quality control filtering (i.e., excluding all SNPs with a minor allele frequency  
 477 less than 5%), 554,712 and 686,626 SNPs remained for BB and TC datasets, respectively.  
 478 Finally, bivariate genetic correlations were estimated using GIBBS2F90 (82), resulting to the  
 479 estimates in Table 2.

480 **Table 2: Genomic correlations estimates and their corresponding standard error (s.e),**  
 481 **number of animals and number of SNPs estimates**

| Pairwise traits           | No of animals | Number of SNP | Genetic correlation (s.e) |
|---------------------------|---------------|---------------|---------------------------|
| <i>Brahman</i>            |               |               |                           |
| AGECL vs IGF1b            | AGECL- 980    | 554K          | -0.65 (0.13)              |
|                           | IGF1b- 964    |               |                           |
| IGF1c vs IGF1b            | IGF1c- 995    | 554K          | 0.86 (0.11)               |
|                           | IGF1b- 964    |               |                           |
| <i>Tropical Composite</i> |               |               |                           |

---

|                |             |      |              |
|----------------|-------------|------|--------------|
| AGECL vs IGF1b | AGECL-996   | 686K | -0.55 (0.14) |
|                | IGF1b- 998  |      |              |
| IGF1b vs IGF1b | IGF1c- 1015 | 686K | 0.93 (0.11)  |
|                | IGF1b- 998  |      |              |

---

482 AGECL, age at first *corpus*; IGF1c, serum levels of insulin growth hormone measured in  
483 cow; IGF1b, serum levels of insulin growth hormone measured in bulls; SNP, Single  
484 Nucleotide Polymorphisms; s.e, standard error

485

#### 486 ***Overview of methods***

487 For each trait considered in the two beef cattle populations, we estimated the genomic  
488 breeding values (gEBVs) of individuals and then back-solved these gEBVs to obtain SNP  
489 effects for all chromosomes using GCTA (83). Using a chromosome-wide approach, we  
490 divided SNPs on the same chromosome into small sliding windows of 500 SNPs each and  
491 then estimated the correlation ( $\mathbf{r}$ ) between traits as being the correlation between the 500-  
492 SNP effects estimated for trait A and the 500-SNP effects estimated for trait B. We then  
493 moved 100 SNPs further from the start of the previous window to select the next 500-SNP  
494 window, which partially overlapped with previous window, hence producing sliding windows  
495 that were 100 SNPs distant from the previous window. This was repeated for each trait pair,  
496 and for each chromosome, in a chromosome-by-chromosome approach. The resulting  $\mathbf{r}$   
497 estimates for all the chromosomes combined were denoted as  $W_1 \dots W_n$ . The graphical  
498 illustration of this framework is presented in Figure 4. Moreover, the coordinates of the  
499 windows ( $W_1 \dots W_n$ ) were mapped to the ARS\_UCD1.2 bovine reference genome. The  
500 signals across the genome were visualized with the  $\mathbf{r}$  estimates of each window on the y-axis  
501 and genomic position (i.e the midpoint of the start and end position of each window) of each  
502 chromosome on the x-axis. The mapping to the bovine reference genome and plotting of the  
503 windows signals' graphs were done using SNP & Variation Suite v8.x Golden Helix (84).

504 Depending on the overall genetic correlation observed between the traits considered, the  
505 driver and antagonizing windows can be deduced. In this study, AGECL and IGF1b were  
506 negatively correlated. Hence, the driver windows were windows with significant and negative  
507  $r$  estimates, while the antagonizings were windows with significant positive  $r$  estimates. For  
508 the positively correlated relationship between IGF1c and IGF1b, the driver windows were  
509 windows with significant and positive  $r$  estimates and the antagonizings were windows with  
510 significant and negative  $r$  estimates. The significance of each window was established with a  
511 permutation test, described in the next section.

## The graphical illustration of the framework

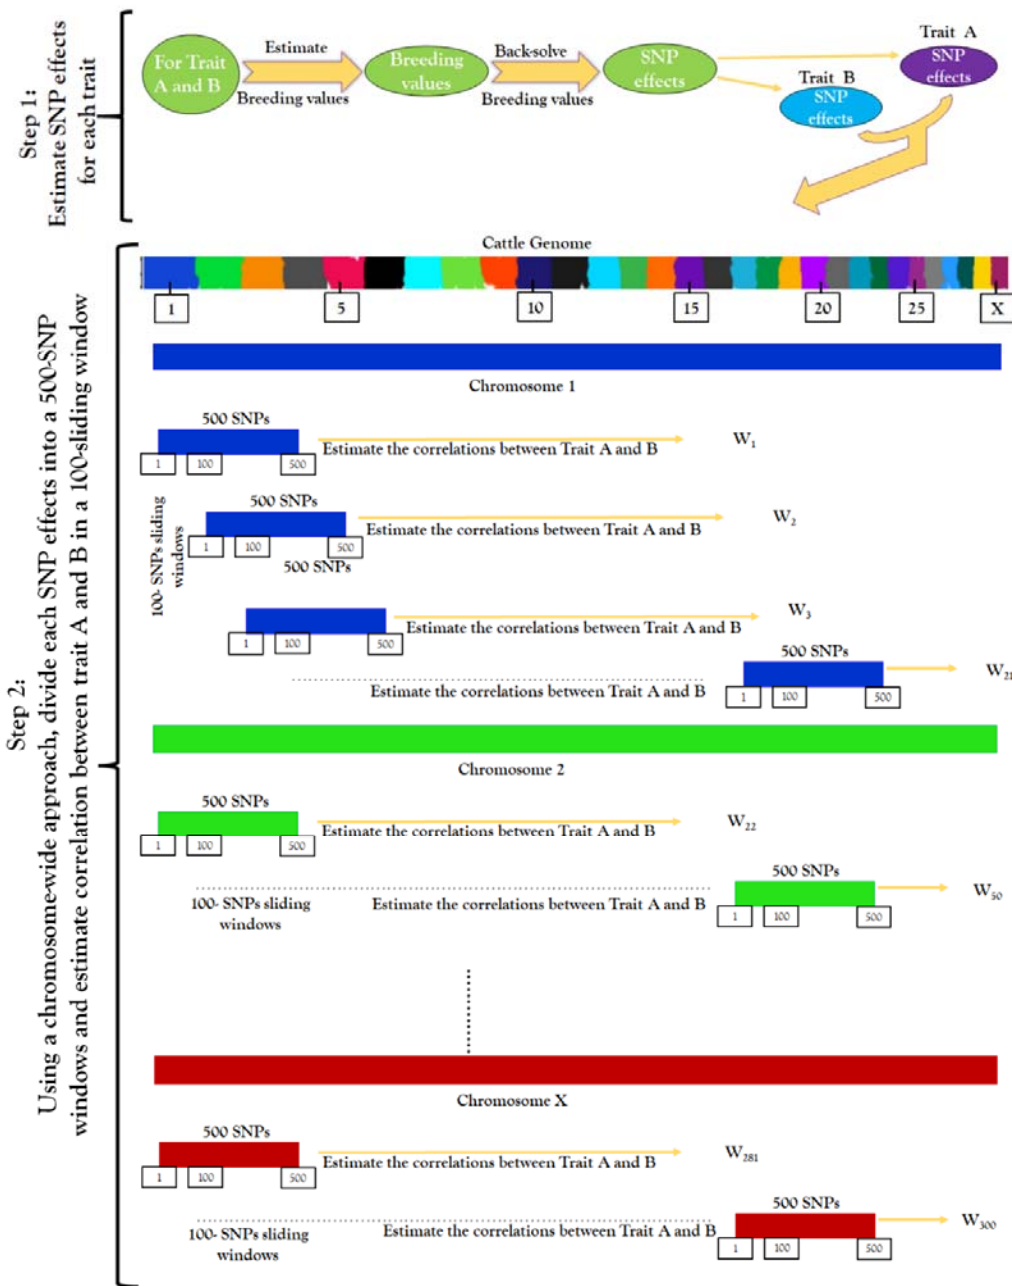

512

513 **Figure 4.** The graphical illustration of the sliding window framework. The framework  
 514 involves 2 steps. Step 1 start from the estimation of genomic breeding values to the  
 515 obtainment of SNP effects for each pairwise trait. Step 2 start from the estimation of 500-

516 SNP effects in a chromosome-wide approach to obtainment of the correlation estimate in a  
517 100-sliding window.

### 518 ***Permutation test***

519 To ensure the  $r$  estimates are not just noise but real signals, we performed permutation test by  
520 randomly reshuffling the SNP effects in each chromosome in 1,000 iterations for each trait.  
521 Subsequently, we estimated correlations for 100-sliding windows of 500-SNP effects as  
522 described above. Finally, we observed the maximum and minimum  $r$  estimates for all the  
523 windows ( $W_1, \dots, W_n$ ) across the 1,000 iterations to reveal windows that were significant on  
524 the pairwise traits under investigation. Afterwards, we mapped the resulting  $r$  estimates for  
525 each window to the ARS\_UCD1.2 bovine reference genome and plot the  $r$  estimates on the  
526 y-axis against the genomic position of each chromosome on the x-axis as described above.  
527 Consequently, significant windows were selected for the drivers and antagonizing genomic  
528 regions for each pairwise. Windows that were not significant were tagged “neutral windows”  
529 i.e., windows with no effect on the pairwise trait. Apart from using these windows to estimate  
530 genomic correlations and investigate the proportion of variance captured by these regions,  
531 they were excluded from other subsequent analyses. Finally, the  $r$  estimates of the significant  
532 windows for the driver and antagonizing regions were ranked from top to bottom in  
533 percentage (%) and the rank values were used solely for the purpose of subsequent  
534 downstream analyses. The ranking was done separately for the driver and antagonizing  
535 windows for each pairwise trait investigated in each population.

### 536 **Gene and Quantitative Traits Loci (QTL) annotation**

537 The significant windows along with their corresponding chromosome coordinates,  $r$   
538 estimates and rank values for the driver and antagonizing regions that passed the specified  
539 threshold criteria following the permutation test in BB and TC were selected. The selected

540 windows were used for gene and QTL annotation using R package GALLO: Genomic  
541 Annotation in Livestock for positional candidate Loci ([https://CRAN.R-](https://CRAN.R-project.org/package=GALLO)  
542 [project.org/package=GALLO](https://CRAN.R-project.org/package=GALLO)) (27). The .gtf annotation file corresponding to the bovine gene  
543 annotation from ARS-UCD1.2 assembly and the .gff file with the QTL information from  
544 cattle QTL Database (<https://www.animalgenome.org/cgi-bin/QTLdb/index>; (85, 86)), were  
545 used for gene and QTL annotation, respectively (27). The two files use the same bovine  
546 reference genome (ARS-UCD1.2) to map the gene and QTLs. A remarkable advantage of  
547 GALLO is that the software retains all the information present in the input file when  
548 producing the output file. As a result, genes within each window can retain their  $r$  estimates  
549 and the rank values specific for their window.

550 The number and percentage of genes and QTLs annotated within a population (BB or TC)  
551 and the overlaps across populations (BB and TC) were investigated. Furthermore, we  
552 examined the QTLs representativeness and diversity to explain better the genomic content of  
553 the significant windows for the driver and antagonizing regions. Hence, the visualization of  
554 the percentage of cattle QTL types from cattle QTL database (i.e milk, reproduction,  
555 production, meat and carcass, health and exterior) were plotted using a pie chart by GALLO  
556 (27).

### 557 *QTLs enrichment analysis*

558 To further test the significance of the QTLs, a within population QTL enrichment analysis  
559 was conducted using a chromosome-based approach. The QTL enrichment analysis, using all  
560 the QTL information annotated within the significant windows for the driver and  
561 antagonizing regions, was performed using the `qtl_enrich` function from GALLO (87, 88).  
562 Briefly, the observed number of QTLs for each trait in each annotated chromosome were  
563 compared with the expected number using a hypergeometric test approach in a 1,000 iteration

564 rounds of random sampling from the entire cattle QTL database. With this approach, a p-  
565 value for the QTL enrichment status of each annotated QTLs within the significant windows  
566 was estimated. These estimated p-values were corrected for multiple testing using a false  
567 discovery rate (FDR) of 5%. In addition, we used chord plots to reveal the relationships  
568 between the two breeds for the enriched reproductive QTLs based on the driver and  
569 antagonizing genomic regions.

### 570 *Functional enrichment analysis*

571 The annotated genes along with their corresponding  $r$  estimates and rank values for the  
572 significant driver and antagonizing windows for each pairwise trait in BB and TC populations  
573 were subjected to enrichment analysis using the commercial QIAGEN's Ingenuity Pathway  
574 Analysis (IPA; v.8.8, <http://www.ingenuity.com>). The IPA allows identifying  
575 overrepresented biological mechanism, metabolic pathways, and diseases and biological  
576 functions that are highly relevant to the traits of interest using the directionality of the  
577 submitted gene list (89, 90). The outcome of our methodology indicates that genes within  
578 each window come with their directionalities, in this case,  $r$  estimates. Thus, we leveraged on  
579 the directionality of each gene by allowing the driver genes to be upregulated and  
580 antagonizing genes to be downregulated.

581 Summarily, a merged dataset containing gene identifiers that were significant for both the  
582 driver and antagonizing windows for each pairwise trait in each population and their  
583 corresponding  $r$  estimates and rank values were uploaded into IPA. The  $r$  estimates were  
584 used as the "Expr Log Ratio" and the rank values were used as p-values. The IPA software  
585 recognizes gene with positive signs (+) for "Expr Log Ratio" as upregulated genes and  
586 negative sign (-) as downregulated genes. We aim to allow the driver gene lists to have  
587 positive values for "Expr Log Ratio" and the antagonizing gene lists to be negative. Where

588 this is not achievable based on the original  $r$  estimates (i.e., AGECL vs IGF1b), we reversed  
589 the sign for the driver and antagonizing genes to meet this objective.

590 Of note, IPA can only analyse a maximum of 8,000 gene list. In most cases, the merged gene  
591 list for each pairwise trait in each population is often  $>8,000$ . Hence, we used the rank values  
592 as the cut-off to select the top  $\sim 80\%$  genes from the driver and antagonizing gene list for the  
593 pathway analyses. Using a proportion of the gene list to infer biological pathways might  
594 result in the loss of some important biological information relevant to the trait of interest. We  
595 analysed the driver and antagonizing gene list separately for each pairwise trait in each  
596 population to ensure no important information was lost because of the cut-offs. Further, we  
597 compare the result of the separate analyses with the merged gene list from the  $\sim 80\%$  cut-off.

598 The pathway analysis was conducted using the “Core Analysis” function implemented within  
599 IPA. In this analysis, associations were calculated using direct and indirect relationships  
600 among the gene lists. At first, the gene lists were mapped to human gene data. Genes without  
601 an associated gene symbol or gene annotation were subjected to an annotation by homology  
602 using BioMart application available in the Ensembl database  
603 (<http://www.ensembl.org/biomart/martview/>) (91, 92). With this approach, we only  
604 considered non-annotated genes with percentage of identity  $\geq 80\%$  with human homolog. The  
605 final datasets used for the IPA analyses are presented in S6 Table. Finally, the “Core  
606 Analysis” was used to identify canonical metabolic pathways enriched at Benjamini–  
607 Hochberg corrected p-values (B-H-P-value) of  $p < 0.01$ .

## 608 **Supporting information**

609 **S1 Table. The number of windows, chromosome number, chromosome coordinates, and**  
610 **correlation estimates for each window for the two pairwise trait in Brahman and**  
611 **Tropical Composite population (XLSX).**



612 **S2 Table. The number of windows, chromosome number, chromosome coordinates, and**  
613 **correlation estimates as well as the maximum and minimum correlation estimate for**  
614 **each window for all trait pairwise in Brahman and Tropical Composite population**  
615 **following permutation test of 500-SNP effects in 100-SNP sliding windows at 1000**  
616 **iterations (XLSX).**

617 **S3 Table. The number of windows, chromosome number, chromosome coordinates,**  
618 **correlation estimates and rank value for driver, antagonizing and the neutral regions**  
619 **that passed the threshold after permutation test in Brahman (BB) population for**  
620 **AGECL vs IGF1b (XLSX).**

621 **S4 Table. The enriched QTLs of the driver and antagonizing regions for all trait**  
622 **pairwise in Brahman and Tropical Composite cattle. The enriched QTLs are rank**  
623 **based on the adj.pval (XLSX).**

624 **S5 Table. The list of the significant enriched canonical metabolic pathways showing all**  
625 **the genes involved in each pathway for all trait pairwise in Brahman and Tropical**  
626 **Composite population. Significantly enriched canonical pathways were identified using**  
627 **Benjamini-Hochberg p-values <0.01. Z-score >2 denote the activation of the pathway.**  
628 **Z-score <-2 indicate the inhibition of the pathway (XLSX).**

629 **S6 Table. The final dataset used for Ingenuity Pathway Analysis (IPA) for all trait**  
630 **pairwise in Brahman and Tropical Composite cattle (XLSX).**

631 **S1 Figure. Genome plots of the correlation estimates from the permutation test at 500**  
632 **iterations in BB and TC for the two pairwise traits. The correlation estimates were**  
633 **plotted on the y-axis and the genomic position of each chromosome on the x-axis,**  
634 **according to the ARS\_UCD1.2 bovine reference genome (DOC).**

635 **S2A-H Figure. Canonical pathways significantly enriched for all trait pairwise in**  
636 **Brahman and Tropical Composite population. Significantly enriched canonical**  
637 **pathways were identified using Benjamini-Hochberg p-values <0.01 (PDF).**

#### 638 **Data availability**

639 The data used in this are available from the Cooperative Research Centre for Beef Genetic  
640 Technologies (Beef CRC). Data are available from <https://www.beefcrc.com> with the  
641 permission of Meat and Livestock Australia and the University of Queensland (if interested  
642 please contact the corresponding author).

#### 643 **Acknowledgements**

644 This research was conducted using the legacy database of the Cooperative Centre for Beef  
645 Genetics Technologies and their core partners including Meat and Livestock Australia. The  
646 authors acknowledge all the participants of the Cooperative Centre for Beef Genetics  
647 Technologies for their efforts in conducting the field trials and recording the phenotypes. We  
648 also acknowledge the mentorship of Professor Steve Moore to Babatunde Olasege in his PhD.

649

#### 650 **References**

- 651 1. Liu S, Yu Y, Zhang S, Cole JB, Tenesa A, Wang T, et al. Epigenomics and genotype-phenotype  
652 association analyses reveal conserved genetic architecture of complex traits in cattle and human.  
653 BMC biology. 2020;18(1):1-16.
- 654 2. Zhang Y, Lu Q, Ye Y, Huang K, Liu W, Wu Y, et al. Local genetic correlation analysis reveals  
655 heterogeneous etiologic sharing of complex traits. bioRxiv. 2020.
- 656 3. Cánovas A, Reverter A, DeAtley KL, Ashley RL, Colgrave ML, Fortes MR, et al. Multi-tissue  
657 omics analyses reveal molecular regulatory networks for puberty in composite beef cattle. PloS one.  
658 2014;9(7):e102551.
- 659 4. Fonseca PAdS, Id-Lahoucine S, Reverter A, Medrano JF, Fortes MS, Casellas J, et al.  
660 Combining multi-OMICs information to identify key-regulator genes for pleiotropic effect on fertility  
661 and production traits in beef cattle. PLoS One. 2018;13(10):e0205295.
- 662 5. Lynch M, Walsh B. Genetics and analysis of quantitative traits. 1998.
- 663 6. Van Rheenen W, Peyrot WJ, Schork AJ, Lee SH, Wray NR. Genetic correlations of polygenic  
664 disease traits: from theory to practice. Nature Reviews Genetics. 2019;20(10):567-81.

- 665 7. Ning Z, Pawitan Y, Shen X. High-definition likelihood inference of genetic correlations across  
666 human complex traits. *Nature genetics*. 2020;52(8):859-64.
- 667 8. Mackay TF, Stone EA, Ayroles JF. The genetics of quantitative traits: challenges and  
668 prospects. *Nature Reviews Genetics*. 2009;10(8):565-77.
- 669 9. Pickrell JK, Berisa T, Liu JZ, Ségurel L, Tung JY, Hinds DA. Detection and interpretation of  
670 shared genetic influences on 42 human traits. *Nature genetics*. 2016;48(7):709-17.
- 671 10. Price AL, Spencer CC, Donnelly P. Progress and promise in understanding the genetic basis of  
672 common diseases. *Proceedings of the Royal Society B: Biological Sciences*.  
673 2015;282(1821):20151684.
- 674 11. Lunstra D, Cundiff L. Growth and pubertal development in brahman-, boran-, tuli-, belgian  
675 blue-, hereford-and angus-sired f1 bulls. *Journal of Animal Science*. 2003;81(6):1414-26.
- 676 12. Fang L, Sahana G, Ma P, Su G, Yu Y, Zhang S, et al. Use of biological priors enhances  
677 understanding of genetic architecture and genomic prediction of complex traits within and between  
678 dairy cattle breeds. *BMC genomics*. 2017;18(1):1-12.
- 679 13. Neyhart JL, Lorenz AJ, Smith KP. Multi-trait improvement by predicting genetic correlations  
680 in breeding crosses. *G3: Genes, Genomes, Genetics*. 2019;9(10):3153-65.
- 681 14. Grotzinger AD, Rhemtulla M, de Vlaming R, Ritchie SJ, Mallard TT, Hill WD, et al. Genomic  
682 structural equation modelling provides insights into the multivariate genetic architecture of complex  
683 traits. *Nature human behaviour*. 2019;3(5):513-25.
- 684 15. Henderson C. Recent developments in variance and covariance estimations. *Journal of*  
685 *Animal Science*. 1986;63(1):208-16.
- 686 16. Lee SH, Van der Werf JH. MTG2: an efficient algorithm for multivariate linear mixed model  
687 analysis based on genomic information. *Bioinformatics*. 2016;32(9):1420-2.
- 688 17. Turley P, Walters RK, Maghziyan O, Okbay A, Lee JJ, Fontana MA, et al. Multi-trait analysis of  
689 genome-wide association summary statistics using MTAG. *Nature genetics*. 2018;50(2):229-37.
- 690 18. Sodini SM, Kemper KE, Wray NR, Trzaskowski M. Comparison of genotypic and phenotypic  
691 correlations: Cheverud's conjecture in humans. *Genetics*. 2018;209(3):941-8.
- 692 19. Collet JM, Fuentes S, Hesketh J, Hill MS, Innocenti P, Morrow EH, et al. Rapid evolution of the  
693 intersexual genetic correlation for fitness in *Drosophila melanogaster*. *Evolution*. 2016;70(4):781-95.
- 694 20. Connallon T, Matthews G. Cross-sex genetic correlations for fitness and fitness components:  
695 connecting theoretical predictions to empirical patterns. *Evolution letters*. 2019;3(3):254-62.
- 696 21. Raidan FS, Porto-Neto LR, Reverter A. Across-sex genomic-assisted genetic correlations for  
697 sex-influenced traits in Brahman cattle. *Genetics Selection Evolution*. 2019;51(1):41.
- 698 22. Bulik-Sullivan BK, Loh P-R, Finucane HK, Ripke S, Yang J, Patterson N, et al. LD Score  
699 regression distinguishes confounding from polygenicity in genome-wide association studies. *Nature*  
700 *genetics*. 2015;47(3):291-5.
- 701 23. Shi H, Mancuso N, Spendlove S, Pasaniuc B. Local genetic correlation gives insights into the  
702 shared genetic architecture of complex traits. *The American Journal of Human Genetics*.  
703 2017;101(5):737-51.
- 704 24. Werme J, van der Sluis S, Posthuma D, de Leeuw C. LAVA: An integrated framework for local  
705 genetic correlation analysis. *bioRxiv*. 2021:2020.12. 31.424652.
- 706 25. Zhang Y, Lu Q, Ye Y, Huang K, Liu W, Wu Y, et al. SUPERGENOVA: local genetic correlation  
707 analysis reveals heterogeneous etiologic sharing of complex traits. *Genome biology*. 2021;22(1):1-  
708 30.
- 709 26. Olasege B, Tahir M, Gouveia G, Kour J, Porto-Neto L, Hayes B, et al. Genetic parameter  
710 estimates for male and female fertility traits using genomic data to improve fertility in Australian  
711 beef cattle.
- 712 27. Fonseca PA, Suárez-Vega A, Marras G, Cánovas Á. GALLO: An R package for genomic  
713 annotation and integration of multiple data sources in livestock for positional candidate loci.  
714 *GigaScience*. 2020;9(12):giaa149.

- 715 28. Basso K, Margolin AA, Stolovitzky G, Klein U, Dalla-Favera R, Califano A. Reverse engineering  
716 of regulatory networks in human B cells. *Nature genetics*. 2005;37(4):382-90.
- 717 29. Boyle EA, Li YI, Pritchard JK. An expanded view of complex traits: from polygenic to  
718 omnigenic. *Cell*. 2017;169(7):1177-86.
- 719 30. Chen B-S, Yang S-K, Lan C-Y, Chuang Y-J. A systems biology approach to construct the gene  
720 regulatory network of systemic inflammation via microarray and databases mining. *BMC Medical  
721 Genomics*. 2008;1(1):1-22.
- 722 31. Satokangas I, Martin S, Helanterä H, Saramäki J, Kulmuni J. Multi-locus interactions and the  
723 build-up of reproductive isolation. *Philosophical Transactions of the Royal Society B*.  
724 2020;375(1806):20190543.
- 725 32. Skelly DA, Raghupathy N, Robledo RF, Graber JH, Chesler EJ. Reference trait analysis reveals  
726 correlations between gene expression and quantitative traits in disjoint samples. *Genetics*.  
727 2019;212(3):919-29.
- 728 33. Antonarakis SE, Chakravarti A, Cohen JC, Hardy J. Mendelian disorders and multifactorial  
729 traits: the big divide or one for all? *Nature Reviews Genetics*. 2010;11(5):380-4.
- 730 34. Goddard M, Kemper K, MacLeod I, Chamberlain A, Hayes B. Genetics of complex traits:  
731 prediction of phenotype, identification of causal polymorphisms and genetic architecture.  
732 *Proceedings of the Royal Society B: Biological Sciences*. 2016;283(1835):20160569.
- 733 35. Moser G, Lee SH, Hayes BJ, Goddard ME, Wray NR, Visscher PM. Simultaneous discovery,  
734 estimation and prediction analysis of complex traits using a Bayesian mixture model. *PLoS genetics*.  
735 2015;11(4):e1004969.
- 736 36. Fortes MR, Reverter A, Zhang Y, Collis E, Nagaraj SH, Jonsson NN, et al. Association weight  
737 matrix for the genetic dissection of puberty in beef cattle. *Proceedings of the National Academy of  
738 Sciences*. 2010;107(31):13642-7.
- 739 37. Bolormaa S, Hayes B, Hawken R, Zhang Y, Reverter A, Goddard M. Detection of chromosome  
740 segments of zebu and taurine origin and their effect on beef production and growth. *Journal of  
741 animal science*. 2011;89(7):2050-60.
- 742 38. Bolormaa S, Pryce JE, Kemper KE, Hayes BJ, Zhang Y, Tier B, et al. Detection of quantitative  
743 trait loci in *Bos indicus* and *Bos taurus* cattle using genome-wide association studies. *Genetics  
744 Selection Evolution*. 2013;45(1):1-12.
- 745 39. Fortes M, Kemper K, Sasazaki S, Reverter A, Pryce J, Barendse W, et al. Evidence for  
746 pleiotropism and recent selection in the PLAG 1 region in Australian beef cattle. *Animal genetics*.  
747 2013;44(6):636-47.
- 748 40. Juma AR, Damdimopoulou PE, Grommen SV, Van de Ven WJ, De Groef B. Emerging role of  
749 PLAG1 as a regulator of growth and reproduction. *Journal of Endocrinology*. 2016;228(2):R45-R56.
- 750 41. Karim L, Takeda H, Lin L, Druet T, Arias JA, Baurain D, et al. Variants modulating the  
751 expression of a chromosome domain encompassing PLAG1 influence bovine stature. *Nature  
752 genetics*. 2011;43(5):405-13.
- 753 42. Koufariotis L, Hayes B, Kelly M, Burns B, Lyons R, Stothard P, et al. Sequencing the mosaic  
754 genome of Brahman cattle identifies historic and recent introgression including polled. *Scientific  
755 reports*. 2018;8(1):1-12.
- 756 43. Littlejohn M, Grala T, Sanders K, Walker C, Waghorn G, Macdonald K, et al. Genetic variation  
757 in PLAG1 associates with early life body weight and peripubertal weight and growth in *Bos taurus*.  
758 *Animal Genetics*. 2012;43(5):591-4.
- 759 44. Nishimura S, Watanabe T, Mizoshita K, Tatsuda K, Fujita T, Watanabe N, et al. Genome-wide  
760 association study identified three major QTL for carcass weight including the PLAG1-CHCHD7 QTN  
761 for stature in Japanese Black cattle. *BMC genetics*. 2012;13(1):1-11.
- 762 45. Paim TdP, Hay E, Wilson C, Thomas M, Kuehn L, Paiva S, et al. Dynamics of genomic  
763 architecture during composite breed development in cattle. *Animal genetics*. 2020;51(2):224-34.
- 764 46. Mank JE. Population genetics of sexual conflict in the genomic era. *Nature Reviews Genetics*.  
765 2017;18(12):721-30.

- 766 47. Parsch J, Ellegren H. The evolutionary causes and consequences of sex-biased gene  
767 expression. *Nature Reviews Genetics*. 2013;14(2):83-7.
- 768 48. Sayadi A, Barrio AM, Immonen E, Dainat J, Berger D, Tellgren-Roth C, et al. The genomic  
769 footprint of sexual conflict. *Nature ecology & evolution*. 2019;3(12):1725-30.
- 770 49. Bione S, Rizzolio F, Sala C, Ricotti R, Goegan M, Manzini M, et al. Mutation analysis of two  
771 candidate genes for premature ovarian failure, DACH2 and POF1B. *Human reproduction*.  
772 2004;19(12):2759-66.
- 773 50. Jedidi I, Ouchari M, Yin Q. Sex chromosomes-linked single-gene disorders involved in human  
774 infertility. *European journal of medical genetics*. 2019;62(9):103560.
- 775 51. Okten G, Gunes S, Onat OE, Tukun A, Ozcelik T, Kocak I. Disruption of HDX gene in premature  
776 ovarian failure. *Systems biology in reproductive medicine*. 2013;59(4):218-22.
- 777 52. Weber TA, Koob S, Heide H, Wittig I, Head B, van der Blik A, et al. APOOL is a cardiolipin-  
778 binding constituent of the Mitofilin/MINOS protein complex determining cristae morphology in  
779 mammalian mitochondria. *PLoS one*. 2013;8(5):e63683.
- 780 53. Kaneko H, Noguchi J, Kikuchi K, Akagi S, Shimada A, Taya K, et al. Production and endocrine  
781 role of inhibin during the early development of bull calves. *Biology of reproduction*. 2001;65(1):209-  
782 15.
- 783 54. Phillips DJ. Activins, inhibins and follistatins in the large domestic species. *Domestic animal*  
784 *endocrinology*. 2005;28(1):1-16.
- 785 55. Johnston D, Corbet N, Barwick S, Wolcott ML, Holroyd R. Genetic correlations of young bull  
786 reproductive traits and heifer puberty traits with female reproductive performance in two tropical  
787 beef genotypes in northern Australia. *Animal Production Science*. 2014;54(1):74-84.
- 788 56. Corbet N, Burns B, Johnston D, Wolcott ML, Corbet D, Venus B, et al. Male traits and herd  
789 reproductive capability in tropical beef cattle. 2. Genetic parameters of bull traits. *Animal Production*  
790 *Science*. 2012;53(2):101-13.
- 791 57. Canal LB, Fontes PL, Sanford CD, Mercadante VR, DiLorenzo N, Lamb GC, et al. Relationships  
792 between feed efficiency and puberty in *Bos taurus* and *Bos indicus*-influenced replacement beef  
793 heifers. *Journal of Animal Science*. 2020;98(10):skaa319.
- 794 58. Perry GA, Cushman R. Effect of age at puberty/conception date on cow longevity. *Veterinary*  
795 *Clinics: Food Animal Practice*. 2013;29(3):579-90.
- 796 59. Bunter KL, Cai W, Johnston DJ, Dekkers JC, Bunter K. Selection to lower residual feed intake  
797 in pigs produces a correlated response in juvenile insulin-like growth factor-I (IGF-1) concentration.
- 798 60. Gao X, Xu X-R, Ren H-Y, Zhang Y-H, Xu S-Z. The effects of the GH, IGF-I and IGF-IBP3 gene on  
799 growth and development traits of Nanyang cattle in different growth period. *Yi Chuan= Hereditas*.  
800 2006;28(8):927-32.
- 801 61. Bolormaa S, Pryce JE, Reverter A, Zhang Y, Barendse W, Kemper K, et al. A multi-trait, meta-  
802 analysis for detecting pleiotropic polymorphisms for stature, fatness and reproduction in beef cattle.  
803 *PLoS genetics*. 2014;10(3):e1004198.
- 804 62. Hackinger S, Zeggini E. Statistical methods to detect pleiotropy in human complex traits.  
805 *Open biology*. 2017;7(11):170125.
- 806 63. Id-Lahoucine S, Molina A, Cánovas A, Casellas J. Screening for epistatic selection signatures:  
807 A simulation study. *Scientific reports*. 2019;9(1):1-5.
- 808 64. Crowley J, Evans R, Mc Hugh N, Kenny D, McGee M, Crews Jr D, et al. Genetic relationships  
809 between feed efficiency in growing males and beef cow performance. *Journal of animal science*.  
810 2011;89(11):3372-81.
- 811 65. Purfield DC, Evans RD, Berry DP. Breed-and trait-specific associations define the genetic  
812 architecture of calving performance traits in cattle. *Journal of animal science*. 2020;98(5):skaa151.
- 813 66. Nguyen T-M, Shafi A, Nguyen T, Draghici S. Identifying significantly impacted pathways: a  
814 comprehensive review and assessment. *Genome biology*. 2019;20(1):1-15.

- 815 67. Bozza WP, Zhang Y, Hallett K, Rosado LAR, Zhang B. RhoGDI deficiency induces constitutive  
816 activation of Rho GTPases and COX-2 pathways in association with breast cancer progression.  
817 *Oncotarget*. 2015;6(32):32723.
- 818 68. Hall A. Rho family gtpases. *Biochemical Society Transactions*. 2012;40(6):1378-82.
- 819 69. Humphries B, Wang Z, Yang C. Rho GTPases: Big Players in Breast Cancer Initiation,  
820 Metastasis and Therapeutic Responses. *Cells*. 2020;9(10):2167.
- 821 70. Vega FM, Ridley AJ. Rho GTPases in cancer cell biology. *FEBS letters*. 2008;582(14):2093-101.
- 822 71. Shibata S, Nagase M, Yoshida S, Kawarazaki W, Kurihara H, Tanaka H, et al. Modification of  
823 mineralocorticoid receptor function by Rac1 GTPase: implication in proteinuric kidney disease.  
824 *Nature medicine*. 2008;14(12):1370-6.
- 825 72. Togawa A, Miyoshi J, Ishizaki H, Tanaka M, Takakura A, Nishioka H, et al. Progressive  
826 impairment of kidneys and reproductive organs in mice lacking Rho GD $\alpha$ . *Oncogene*.  
827 1999;18(39):5373-80.
- 828 73. Ishizaki H, Togawa A, Tanaka-Okamoto M, Hori K, Nishimura M, Hamaguchi A, et al.  
829 Defective chemokine-directed lymphocyte migration and development in the absence of Rho  
830 guanosine diphosphate-dissociation inhibitors  $\alpha$  and  $\beta$ . *The Journal of Immunology*.  
831 2006;177(12):8512-21.
- 832 74. Huta Y, Nitzan Y, Breitbart H. Ezrin protects bovine spermatozoa from spontaneous  
833 acrosome reaction. *Theriogenology*. 2020;151:119-27.
- 834 75. Shi Z-H, Zhao C, Wu H, Liu X-M. Expression of RhoGDI alpha in human testes and sperm and  
835 its correlation with the success rate of IVF. *Zhonghua nan ke xue= National Journal of Andrology*.  
836 2011;17(4):325-9.
- 837 76. Wang L, Chen W, Zhao C, Huo R, Guo X-J, Lin M, et al. The role of ezrin-associated protein  
838 network in human sperm capacitation. *Asian journal of andrology*. 2010;12(5):667.
- 839 77. Burns B, Fordyce G, Holroyd R. A review of factors that impact on the capacity of beef cattle  
840 females to conceive, maintain a pregnancy and wean a calf—Implications for reproductive efficiency  
841 in northern Australia. *Animal Reproduction Science*. 2010;122(1-2):1-22.
- 842 78. McLean I, Holmes P, Counsell D. Final Report: The Northern beef report, 2013 Northern beef  
843 situation analysis (B. COM. 0348). Meat and Livestock Australia, Sydney. 2013.
- 844 79. Chang AZ, Swain DL, Trotter MG. Calf loss in northern Australia: a systematic review. *The*  
845 *Rangeland Journal*. 2020;42(1):9-26.
- 846 80. Fordyce G. Pregnancy rates achieved by mating bulls with different percentages of  
847 morphologically normal sperm. Bullpower Delivery of adequate normal sperm to site of fertilisation  
848 Project NAP3. 2005;117:142-51.
- 849 81. Rosen BD, Bickhart DM, Schnabel RD, Koren S, Elisk CG, Tseng E, et al. De novo assembly of  
850 the cattle reference genome with single-molecule sequencing. *GigaScience*. 2020;9(3):giaa021.
- 851 82. Misztal I, Tsuruta S, Strabel T, Auvray B, Druet T, Lee D, editors. BLUPF90 and related  
852 programs (BGF90). Proceedings of the 7th world congress on genetics applied to livestock  
853 production; 2002.
- 854 83. Yang J, Lee SH, Goddard ME, Visscher PM. GCTA: a tool for genome-wide complex trait  
855 analysis. *The American Journal of Human Genetics*. 2011;88(1):76-82.
- 856 84. Bozeman M. Golden Helix, Inc. SNP & Variation Suite™[Software]. [(Version 8.x)].  
857 Available from <http://www.goldenhelix.com>.
- 858 85. Hu Z-L, Park CA, Reecy JM. Developmental progress and current status of the Animal QTLdb.  
859 *Nucleic acids research*. 2016;44(D1):D827-D33.
- 860 86. Hu Z-L, Park CA, Wu X-L, Reecy JM. Animal QTLdb: an improved database tool for livestock  
861 animal QTL/association data dissemination in the post-genome era. *Nucleic acids research*.  
862 2013;41(D1):D871-D9.
- 863 87. Lam S, Miglior F, Fonseca P, Gómez-Redondo I, Zeidan J, Suárez-Vega A, et al. Identification  
864 of functional candidate variants and genes for feed efficiency in Holstein and Jersey cattle breeds  
865 using RNA-sequencing. *Journal of dairy science*. 2021;104(2):1928-50.

- 866 88. Sweett H, Fonseca P, Suarez-Vega A, Livernois A, Miglior F, Cánovas A. Genome-wide  
867 association study to identify genomic regions and positional candidate genes associated with male  
868 fertility in beef cattle. *Scientific reports*. 2020;10(1):1-14.
- 869 89. Krämer A, Green J, Pollard Jr J, Tugendreich S. Causal analysis approaches in ingenuity  
870 pathway analysis. *Bioinformatics*. 2014;30(4):523-30.
- 871 90. Medici V, Kieffer DA, Shibata NM, Chima H, Kim K, Canovas A, et al. Wilson Disease:  
872 Epigenetic effects of choline supplementation on phenotype and clinical course in a mouse model.  
873 *Epigenetics*. 2016;11(11):804-18.
- 874 91. Cardoso TF, Quintanilla R, Castelló A, González-Prendes R, Amills M, Cánovas Á. Differential  
875 expression of mRNA isoforms in the skeletal muscle of pigs with distinct growth and fatness profiles.  
876 *BMC genomics*. 2018;19(1):1-12.
- 877 92. Durinck S, Moreau Y, Kasprzyk A, Davis S, De Moor B, Brazma A, et al. BioMart and  
878 Bioconductor: a powerful link between biological databases and microarray data analysis.  
879 *Bioinformatics*. 2005;21(16):3439-40.
